# Supplementary material for: Palladium oxide-decorated mesoporous silica on graphene oxide nanosheets as a heterogeneous catalyst for the synthesis of β-substituted indole derivatives
Source: Royal Society of Chemistry journal article supplement (doi:10.1039/d1dt00408e), 2021-01-01
Supplement: d1dt00408e1.pdf [file d1dt00408e1.pdf]

**Palladium Oxide-Decorated Mesoporous Silica on Graphene Oxide Nanosheets as  
Heterogeneous Catalyst for Synthesis of  $\alpha$ -Substituted Indole Derivatives**

Digvijay Sah, Javaid Shabir, Surabhi, Padmini Gupta and Subho Mozumdar\*

Department of Chemistry, University of Delhi, Delhi-110007, India

**Electronic Supplementary Information  
(ESI)**

## Table of Contents

|                                                                                                                                                                                                            |         |
|------------------------------------------------------------------------------------------------------------------------------------------------------------------------------------------------------------|---------|
| Spectral Data of Representative Products                                                                                                                                                                   | D3-D28  |
| Calculation of green chemistry matrices                                                                                                                                                                    | D29-D30 |
| <b>Table D1:</b> Optimization of effective catalyst, catalyst amount and an appropriate solvent for access $\alpha$ -substituted indole derivatives by using RGO-MSiO <sub>2</sub> /PdO HY-NM as catalyst  | D31     |
| FT-IR spectrum of Representative Products                                                                                                                                                                  | D32     |
| <b>Table D2:</b> Comparative study of RGO-MSiO <sub>2</sub> /PdO with previously published diverse reports based on GO/SiO <sub>2</sub> catalysts.                                                         | D33     |
| <b>Table D3:</b> Comparative study of RGO-MSiO <sub>2</sub> /PdO with previously published diverse reports based on other GO nanocomposites for the synthesis of $\alpha$ -substituted indole derivatives. | D33-D34 |
| <b>References</b>                                                                                                                                                                                          | D34-D35 |



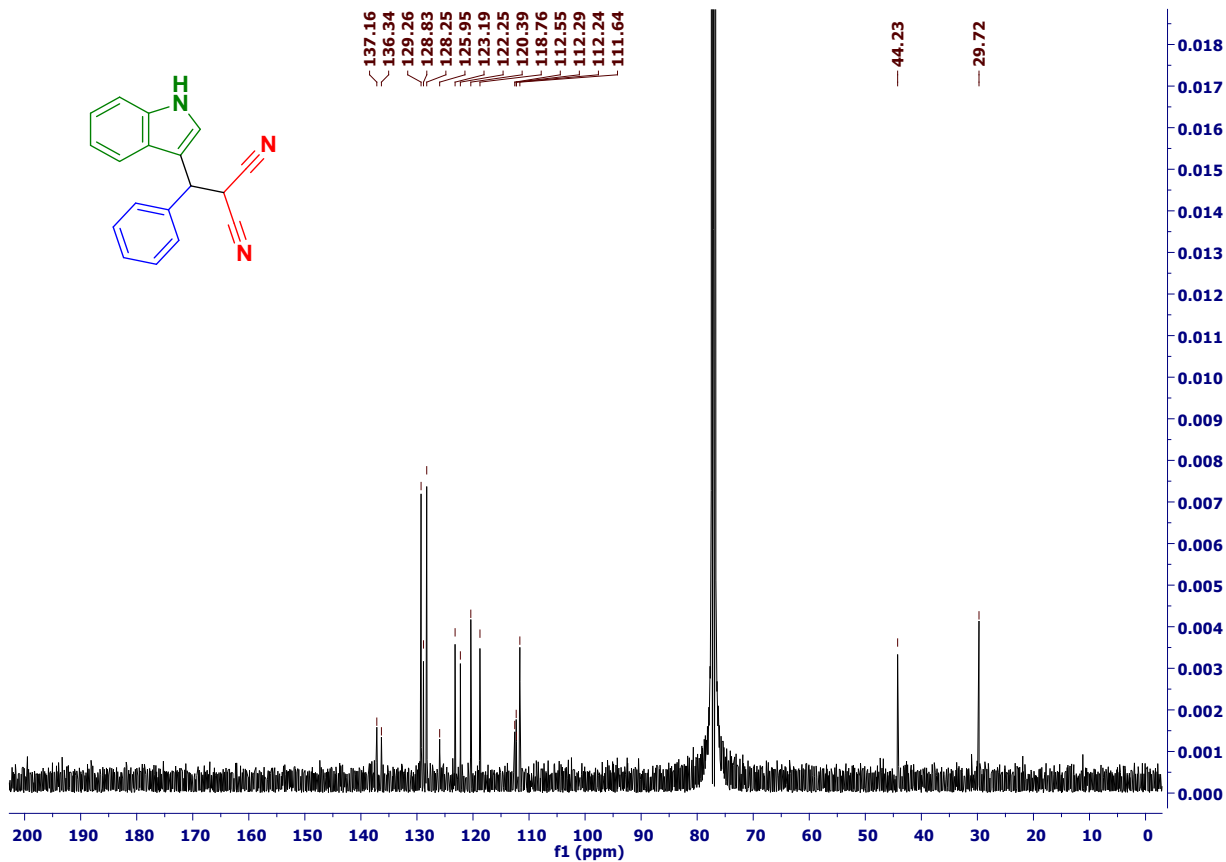

**Fig. 1(b):** <sup>13</sup>C-NMR of 2-((1H-indol-3-yl)(phenyl)methyl)malononitrile

## 2. 2-((1H-indol-3-yl)(4-nitrophenyl)methyl)malononitrile

Light Yellow Solid; <sup>1</sup>H NMR (400 MHz, CDCl<sub>3</sub>): δ 8.42 (brs, 1H), 8.26 (d, 2H, J = 8.4 Hz), 7.65 (d, 2H, J = 8.8 Hz), 7.41 (d, 2H, J = 8.4 Hz), 7.19 (d, 1H, J = 8 Hz), 7.08 (t, 1H, J = 7.2 Hz), 5.05 (d, 1H, J = 6.0 Hz), 4.52 (d, 1H, J = 6.0 Hz) ppm. <sup>13</sup>C NMR (75 MHz, CDCl<sub>3</sub>): δ 148.15, 144.09, 136.38, 129.52, 125.49, 124.47, 123.61, 122.34, 120.78, 118.36, 111.95, 111.75, 111.68, 111.18, 43.83, 29.13 ppm. HRMS (ES): Calcd: 316.0966. Found: 317.1038 [M+H]<sup>+</sup> and 318.1068 [MH+2]<sup>+</sup>. FT-IR (ν<sub>max</sub>/cm<sup>-1</sup>, KBr): 3318, 3066, 2907, 2253, 1603, 1522, 1349, 1229, 749 cm<sup>-1</sup>.

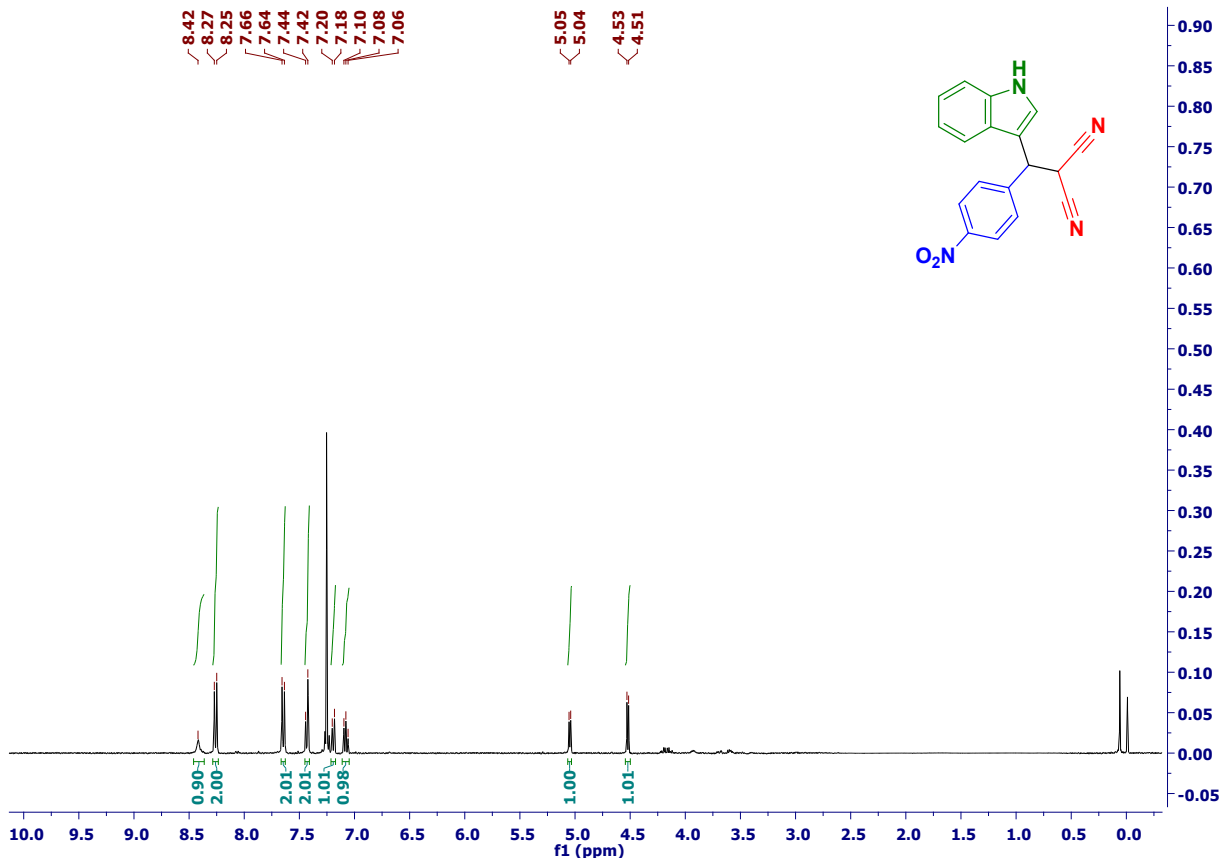

**Fig. 2(a):** <sup>1</sup>H-NMR of 2-((1H-indol-3-yl)(4-nitrophenyl)methyl)malononitrile

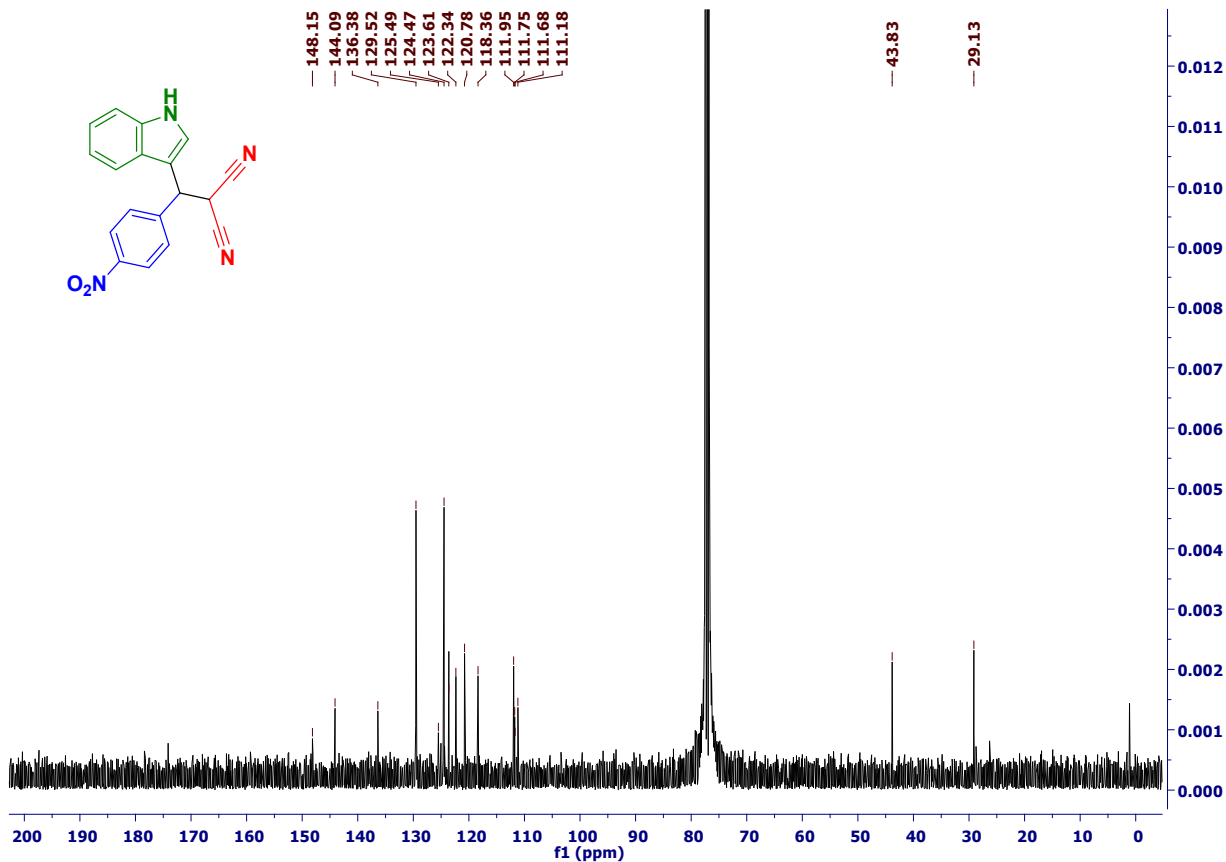

**Fig. 2(b):** <sup>13</sup>C-NMR of 2-((1H-indol-3-yl)(4-nitrophenyl)methyl)malononitrile

### 3. 2-((4-chlorophenyl)(1H-indol-3-yl)methyl)malononitrile

Orange-White Solid; <sup>1</sup>H NMR (400 MHz, CDCl<sub>3</sub>): δ 8.38 (brs, 1H), 7.33-7.40 (m, 6H), 7.20-7.24 (m, 2H), 7.06 (t, 1H, J = 8.4 Hz), 4.89 (d, 1H, J = 6.4 Hz), 4.44 (d, 1H, J = 6 Hz) ppm. <sup>13</sup>C NMR (75 MHz, CDCl<sub>3</sub>): δ 136.37, 135.62, 134.85, 129.71, 129.53, 128.48, 125.73, 123.33, 122.14, 120.45, 118.71, 112.14, 112.07, 112.02, 43.57, 29.56 ppm. HRMS (ES): Calcd: 305.0720. Found: 306.0793 [M+H]<sup>+</sup> and 307.0823 [MH+2]<sup>+</sup>. FT-IR (ν<sub>max</sub>/cm<sup>-1</sup>, KBr): 3410, 3059, 2898, 2252, 1678, 1545, 1490, 1223, 1094, 746, 581 cm<sup>-1</sup>.

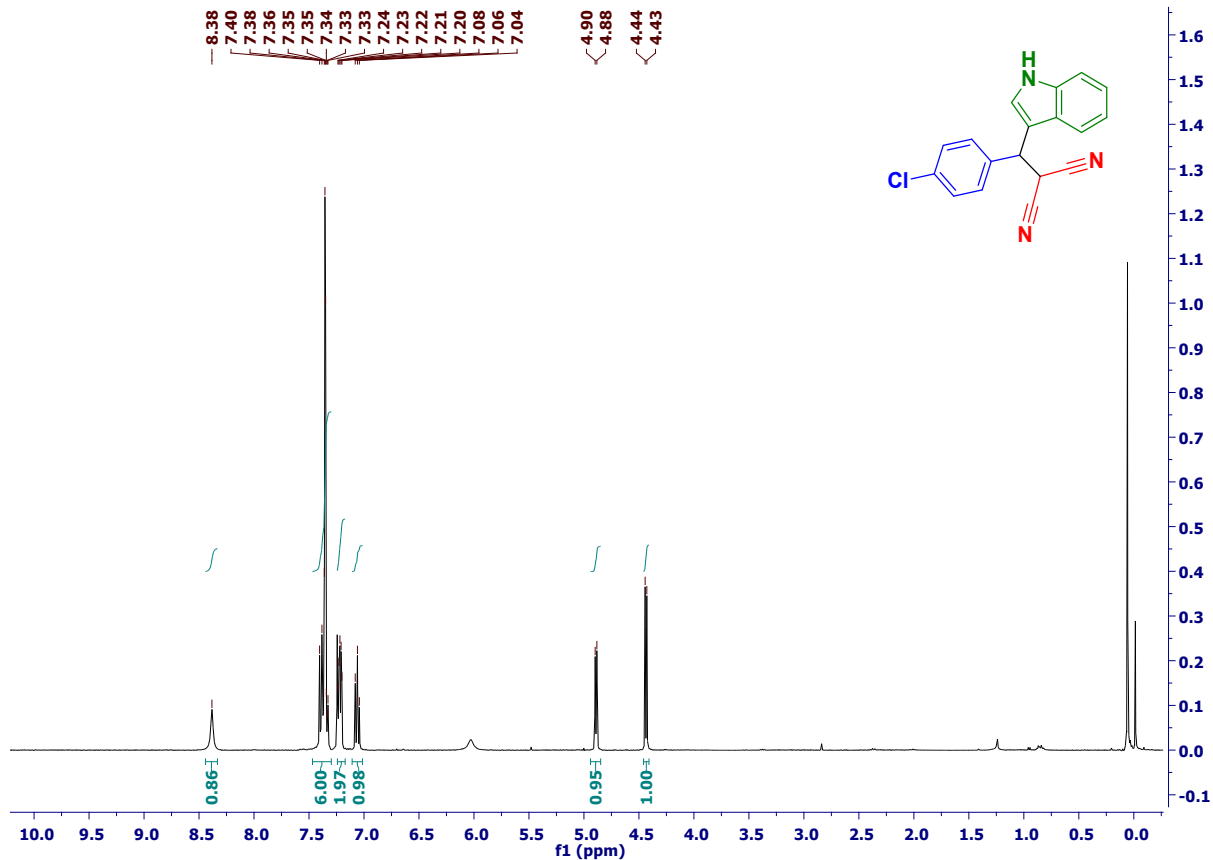

**Fig. 3(a):** <sup>1</sup>H-NMR of 2-((4-chlorophenyl)(1H-indol-3-yl)methyl)malononitrile

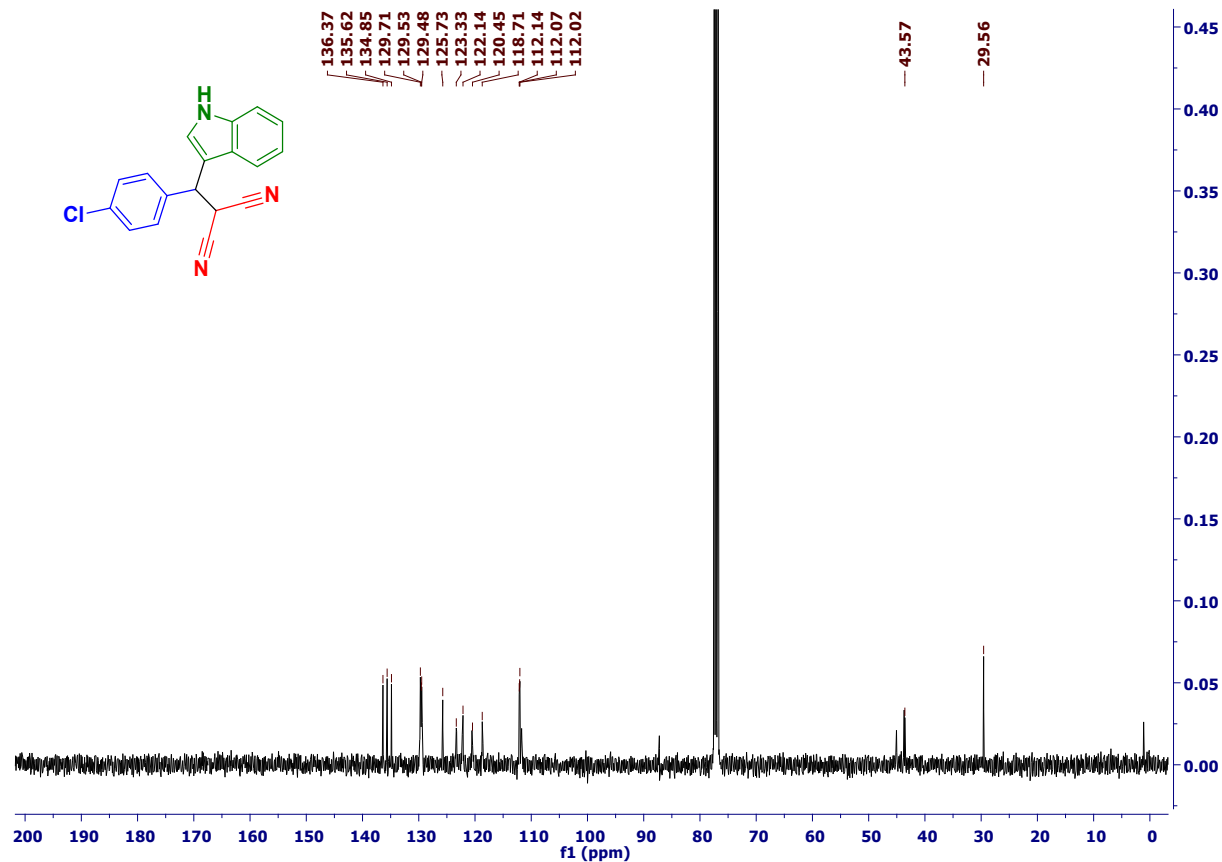

**Fig. 3(b):**  $^{13}\text{C}$ -NMR of 2-((4-chlorophenyl)(1H-indol-3-yl)methyl)malononitrile

#### 4. 2-((2-chlorophenyl)(1H-indol-3-yl)methyl)malononitrile

Orange-Red Solid;  $^1\text{H}$  NMR (400 MHz,  $\text{CDCl}_3$ ):  $\delta$  8.38 (brs, 1H), 7.57 (d, 1H,  $J = 2$  Hz), 7.48 (dd, 1H,  $J = 8$  Hz,  $J_2 = 1.2$  Hz), 7.40 (d, 1H,  $J = 8.8$  Hz), 7.26-7.32 (m, 2H), 7.18-7.24 (m, 3H), 7.06 (t, 1H,  $J = 8$  Hz), 5.53 (d, 1H,  $J = 5.6$  Hz), 4.54 (d, 1H,  $J = 6$  Hz) ppm.  $^{13}\text{C}$  NMR (75 MHz,  $\text{CDCl}_3$ ):  $\delta$  136.26, 134.63, 133.58, 130.20, 130.15, 130.05, 127.83, 126.09, 123.29, 122.52, 120.44, 118.67, 112.14, 112.02, 111.65, 111.03, 40.10, 27.71 ppm. HRMS (ES): Calcd: 305.0734. Found: 306.0807  $[\text{M}+\text{H}]^+$  and 307.0840  $[\text{MH}+2]^+$ .



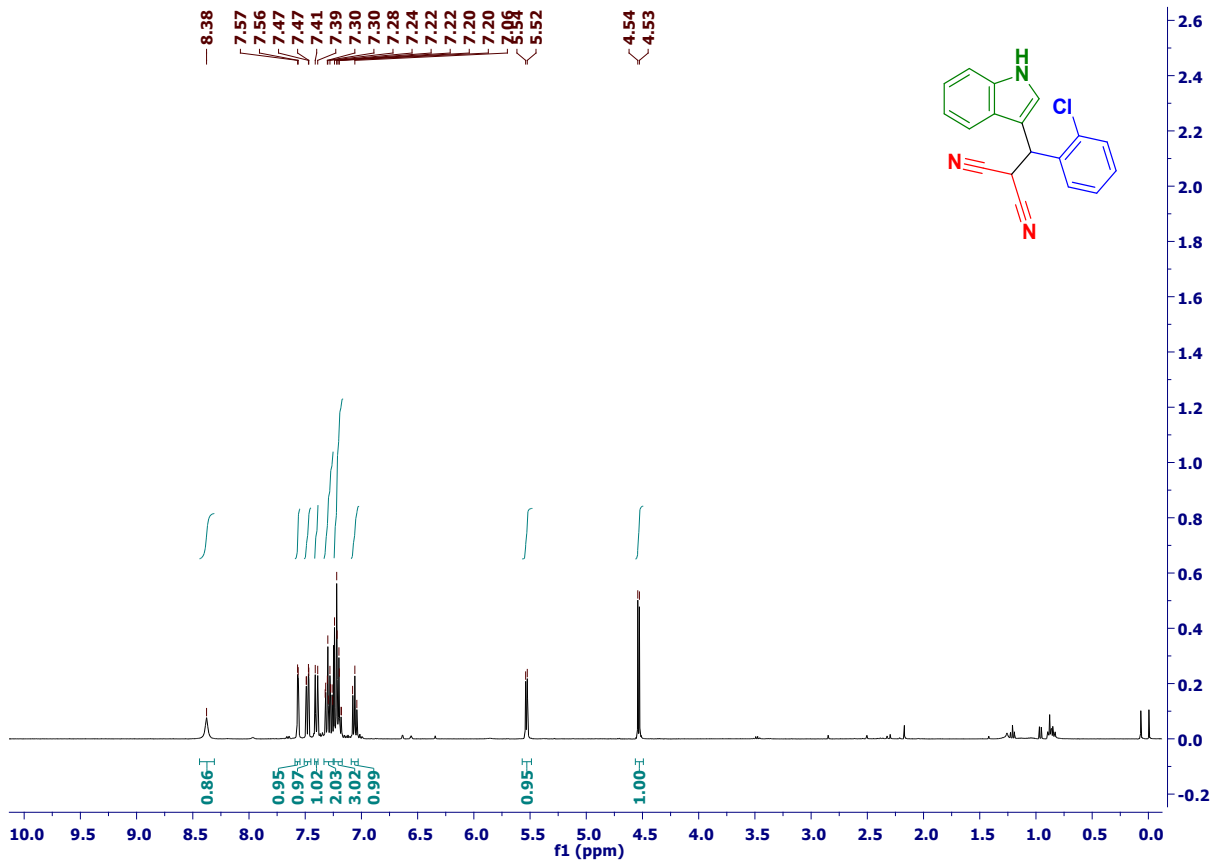

Fig. 4(a): <sup>1</sup>H-NMR of 2-((2-chlorophenyl)(1H-indol-3-yl)methyl)malononitrile

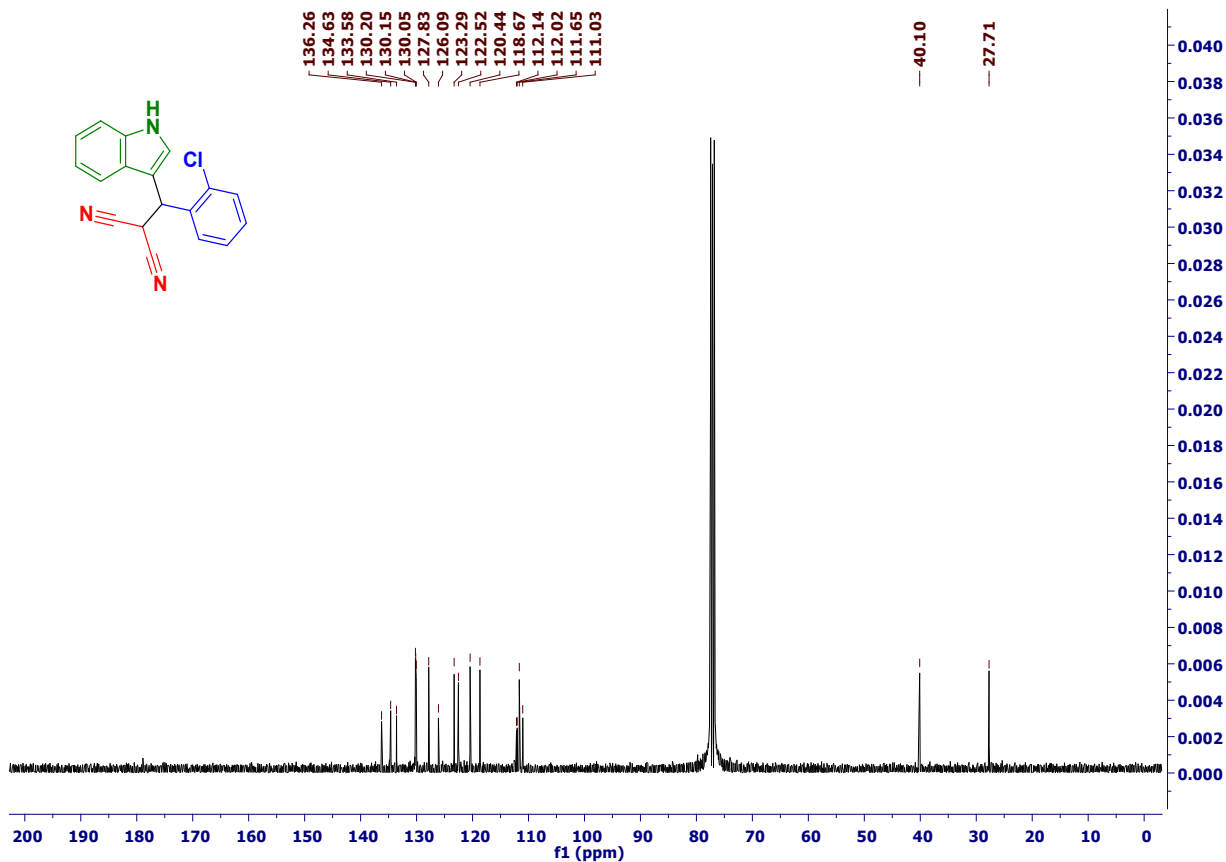

**Fig. 4(b):** <sup>13</sup>C-NMR of 2-((2-chlorophenyl)(1H-indol-3-yl)methyl)malononitrile

**5. 2-((5-chloro-2-hydroxyphenyl)(1H-indol-3-yl)methyl)malononitrile**

Yellow Solid; <sup>1</sup>H NMR (400 MHz, CDCl<sub>3</sub>): δ 8.16 (brs, 1H), 7.66 (s, 1H), 7.46 (d, 1H, J = 8 Hz), 7.34-7.36 (m, 1H), 7.31 (d, 1H, J = 8 Hz), 7.12-7.18 (m, 2H), 6.96-7.05 (m, 2H), 5.00 (s, 1H), 4.63 (s, 1H) ppm. <sup>13</sup>C NMR (75 MHz, CDCl<sub>3</sub>): δ 158.89, 147.16, 136.98, 129.93, 129.81, 129.24, 128.22, 125.43, 124.56, 122.61, 122.37, 119.84, 118.96, 118.35, 117.57, 111.54, 60.56, 32.76 ppm. HRMS (ES): Calcd: 321.0669 Found: 322.0752 [M+H]<sup>+</sup> and 323.0782 [MH+2]<sup>+</sup>. FT-IR (ν<sub>max</sub>/cm<sup>-1</sup>, KBr): 3409, 3307, 3050, 2925, 2197, 1649, 1608, 1480, 1246, 1182, 1094, 746, 585 cm<sup>-1</sup>.

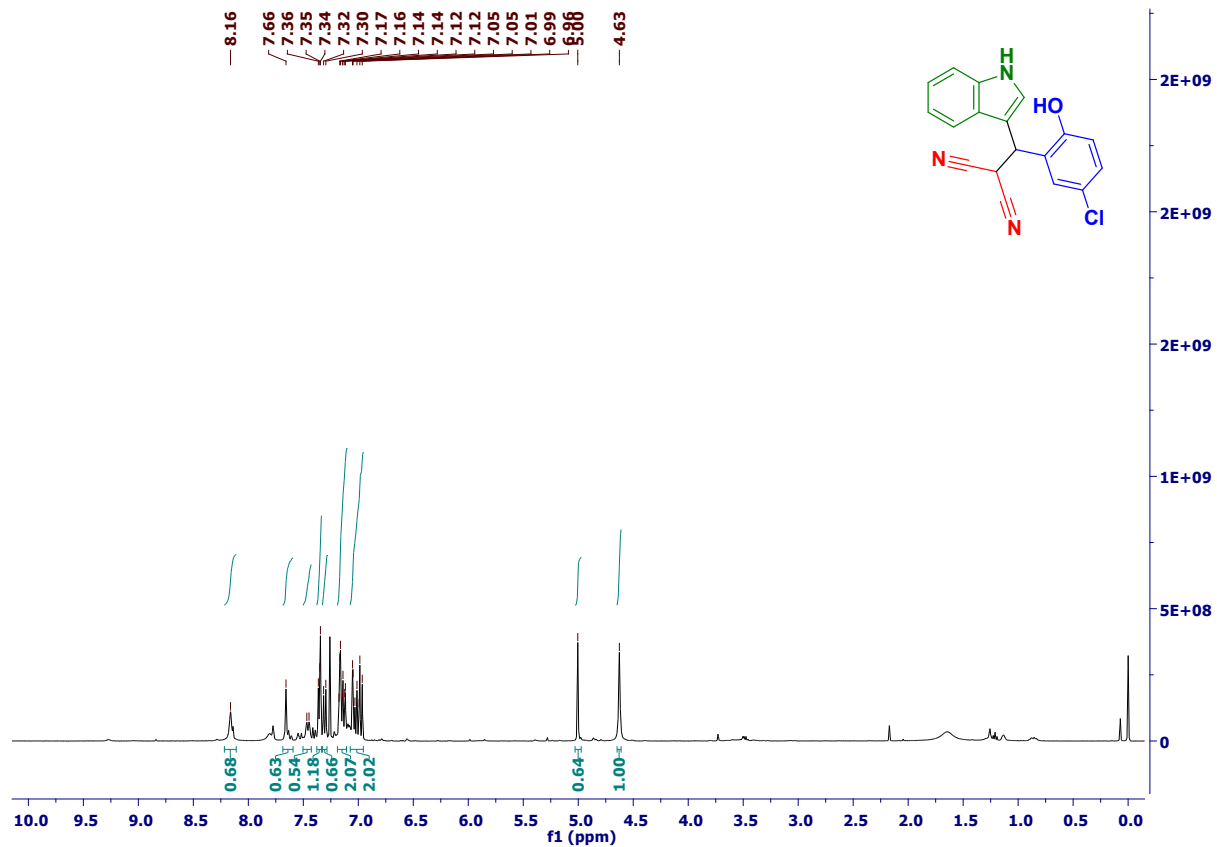

**Fig. 5(a):** <sup>1</sup>H-NMR of 2-((5-chloro-2-hydroxyphenyl)(1H-indol-3-yl)methyl)malononitrile

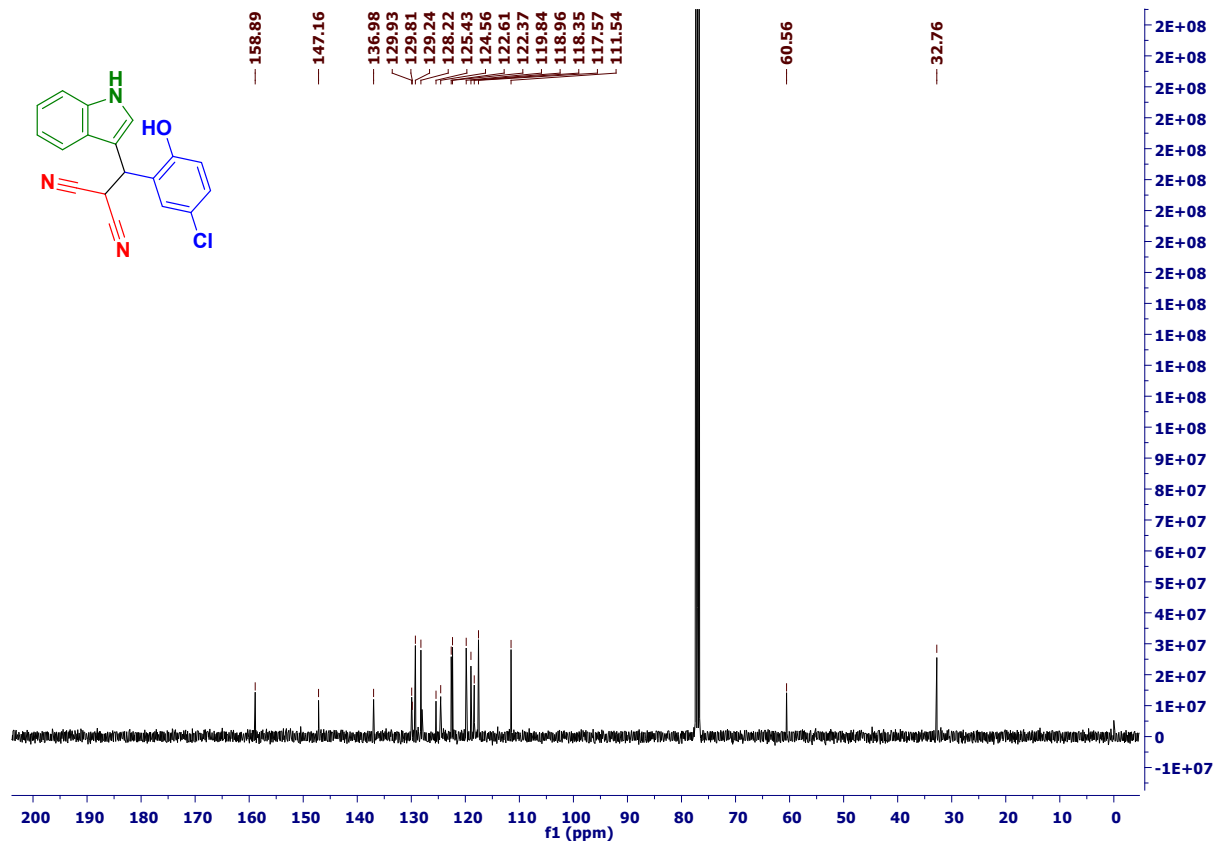

**Fig. 5(b):**  $^{13}\text{C}$ -NMR of 2-((5-chloro-2-hydroxyphenyl)(1H-indol-3-yl)methyl)malononitrile

#### 6. 2-((5-bromo-2-hydroxyphenyl)(1H-indol-3-yl)methyl)malononitrile

Orange Solid;  $^1\text{H}$  NMR (400 MHz,  $\text{CDCl}_3$ ):  $\delta$  8.09 (brs, 1H), 7.73-7.82 (m, 1H), 7.29-7.57 (m, 3H), 7.15-7.21 (m, 2H), 7.02 (t, 1H,  $J = 7.6$  Hz), 6.93 (d, 1H,  $J = 8.8$  Hz), 5.01 (s, 1H), 4.59 (s, 1H) ppm.  $^{13}\text{C}$  NMR (75 MHz,  $\text{CDCl}_3$ ):  $\delta$  158.82, 147.72, 138.18, 137.51, 132.22, 131.15, 125.41, 124.95, 124.14, 122.58, 122.40, 119.86, 118.97, 117.94, 117.46, 111.53, 32.67, 29.69 ppm. HRMS (ES): Calcd: 365.0164 Found: 366.0219  $[\text{M}+\text{H}]^+$  and 367.0245  $[\text{MH}+2]^+$ . FT-IR ( $\nu_{\text{max}}/\text{cm}^{-1}$ , KBr): 3420, 3201, 3062, 2925, 2187, 1650, 1602, 1476, 1262, 1180, 1072, 743, 473  $\text{cm}^{-1}$ .

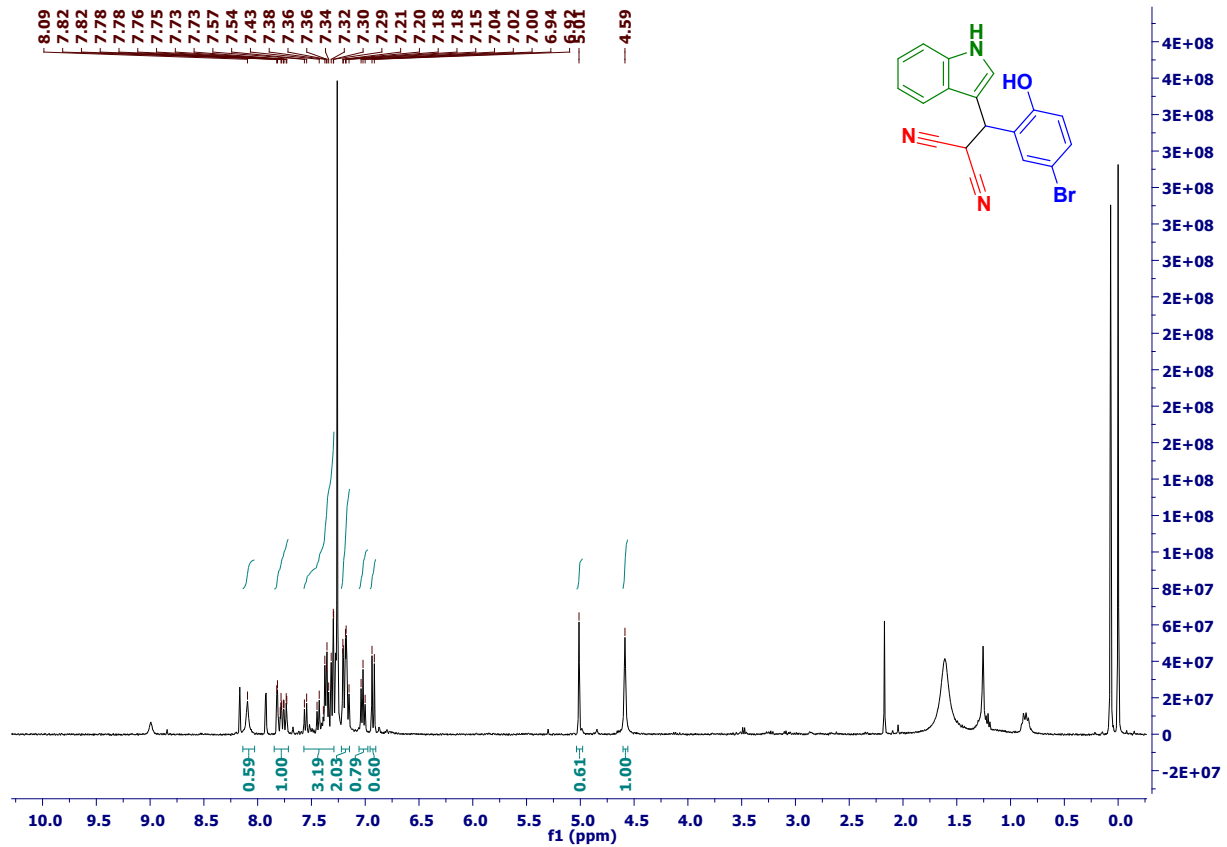

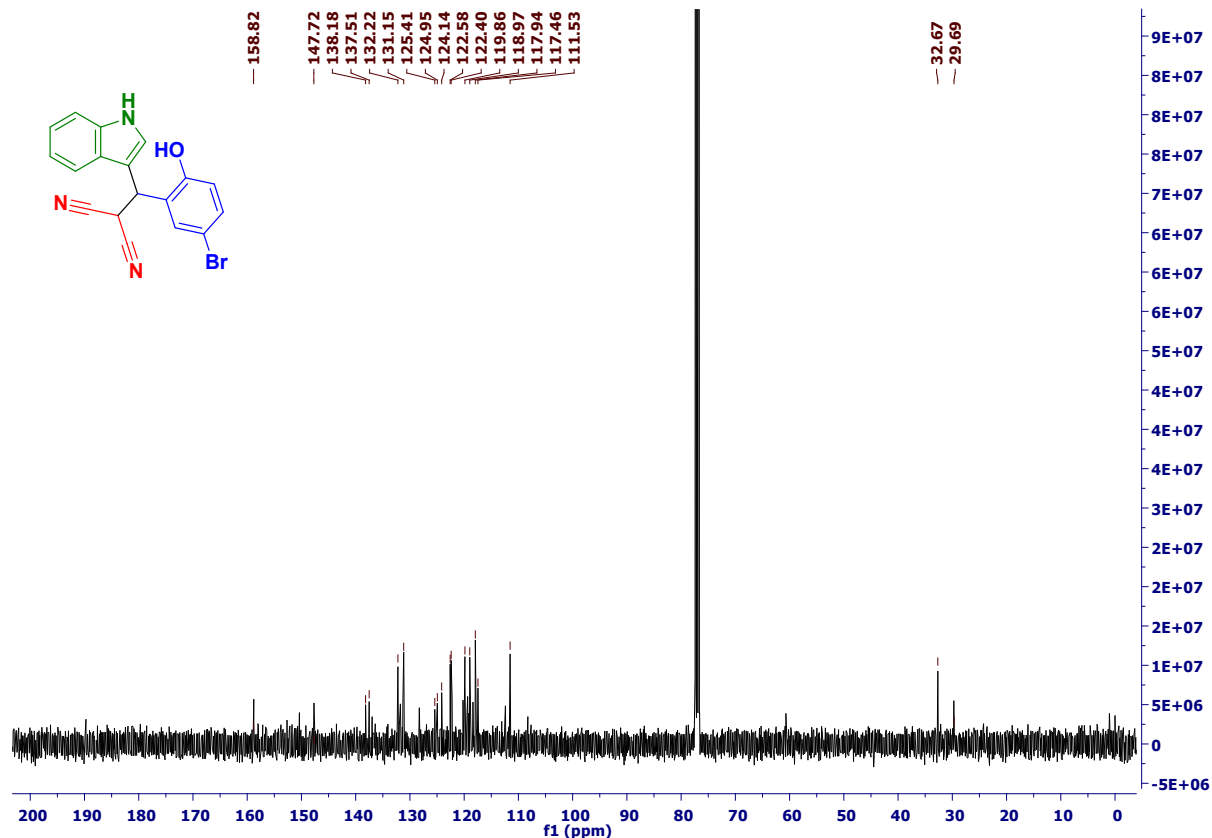

**Fig. 6(b):**  $^{13}\text{C}$ -NMR of 2-((5-bromo-2-hydroxyphenyl)(1H-indol-3-yl)methyl)malononitrile

### 7. 2-((3,5-dichloro-2-hydroxyphenyl)(1H-indol-3-yl)methyl)malononitrile

Yellow Solid;  $^1\text{H}$  NMR (400 MHz,  $\text{CDCl}_3$ ):  $\delta$  8.16 (brs, 1H), 7.37-7.42 (m, 2H), 7.31 (d, 1H,  $J = 8$  Hz), 7.17-7.23 (m, 2H), 6.97-7.07 (m, 2H), 5.03 (s, 1H), 4.75 (s, 1H) ppm.  $^{13}\text{C}$  NMR (75 MHz,  $\text{CDCl}_3$ ):  $\delta$  178.05, 160.17, 153.42, 145.43, 140.43, 139.92, 139.04, 131.15, 128.70, 128.68, 127.76, 122.74, 122.56, 120.06, 118.84, 111.60, 45.02, 33.12 ppm. HRMS (ES): Calcd: 355.0279 Found: 356.0349  $[\text{M}+\text{H}]^+$  and 357.0337  $[\text{MH}+2]^+$ . FT-IR ( $\nu_{\text{max}}/\text{cm}^{-1}$ , KBr): 3405, 3200, 3070, 2919, 2193, 1652, 1576, 1519, 1186, 1156, 1096, 745, 564  $\text{cm}^{-1}$ .

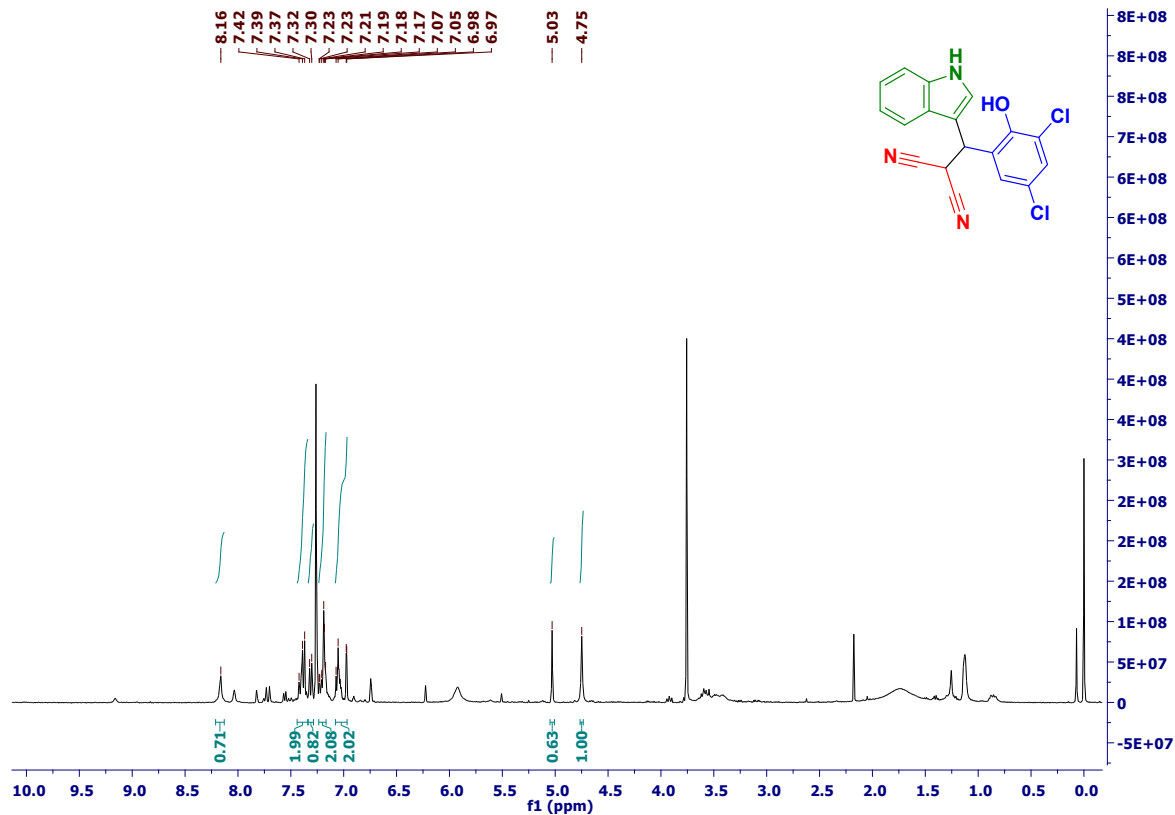

**Fig. 7(a):** <sup>1</sup>H-NMR of 2-((3,5-dichloro-2-hydroxyphenyl)(1H-indol-3-yl)methyl)malononitrile

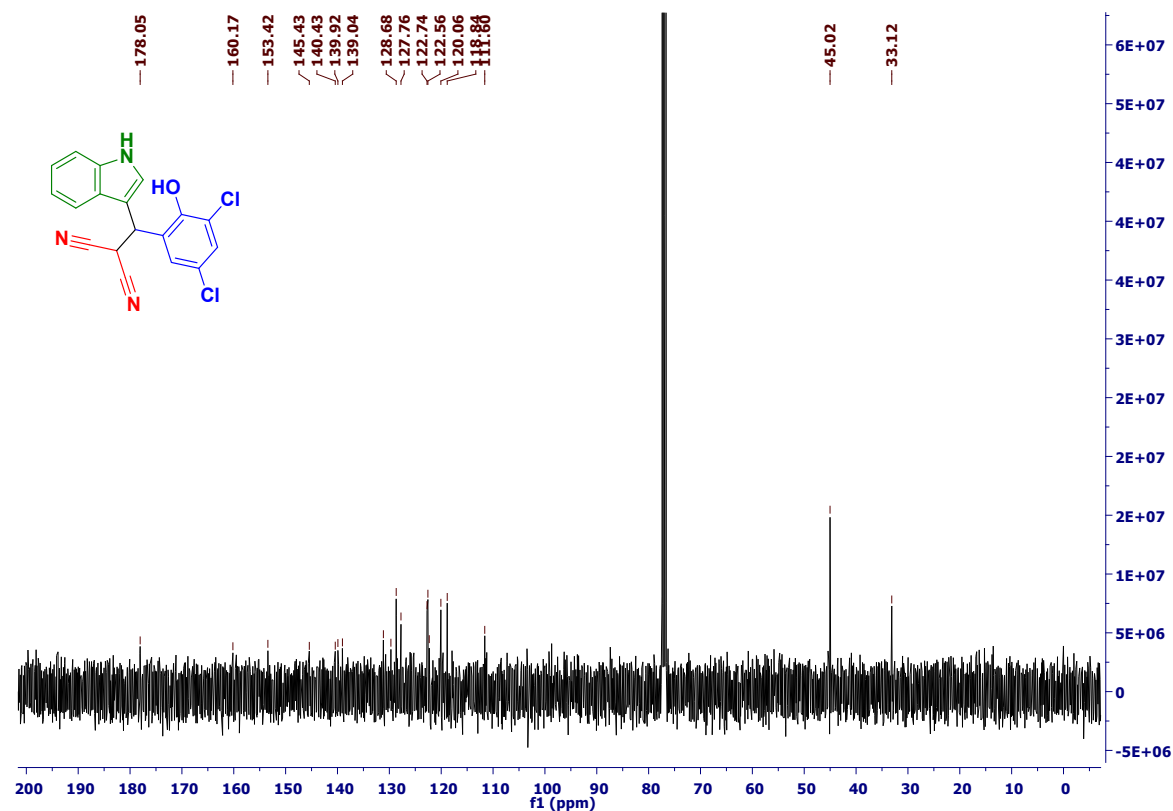

**Fig. 7(b):**  $^{13}\text{C}$ -NMR of 2-((3,5-dichloro-2-hydroxyphenyl)(1H-indol-3-yl)methyl)malononitrile

### 8. 2-((2-fluorophenyl)(1H-indol-3-yl)methyl)malononitrile

Red-Brown Solid;  $^1\text{H}$  NMR (400 MHz,  $\text{CDCl}_3$ ):  $\delta$  8.40 (brs, 1H), 7.48 (d, 1H,  $J = 2.4$  Hz), 7.30-7.41 (m, 3H), 7.22 (d, 1H,  $J = 8\text{Hz}$ ), 7.17 (d, 1H,  $J = 9.2\text{Hz}$ ), 7.07-7.13 (m, 3H), 5.32 (d, 1H,  $J = 6.8\text{Hz}$ ), 4.55 (d, 1H,  $J = 7.2\text{Hz}$ ) ppm.  $^{13}\text{C}$  NMR (75 MHz,  $\text{CDCl}_3$ ):  $\delta$  161.68, 136.20, 130.60, 129.85, 125.99, 125.07, 124.41, 123.23, 122.57, 120.45, 118.47, 116.20, 115.98, 112.17, 111.73, 110.99, 37.24, 28.40 ppm. HRMS (ES): Calcd: 289.1015 Found: 290.1087  $[\text{M}+\text{H}]^+$  and 291.1182  $[\text{MH}+2]^+$ .



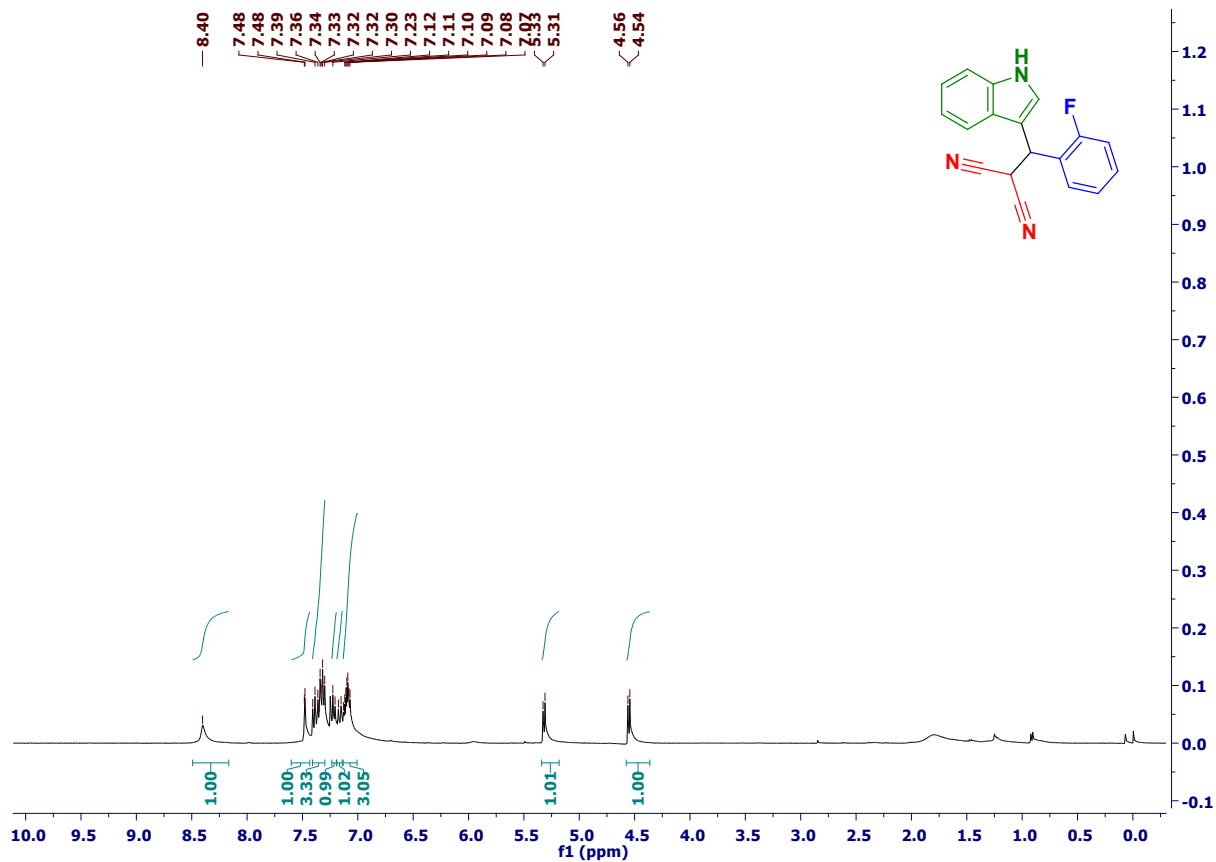

**Fig. 8(a):**  $^1\text{H-NMR}$  of 2-((2-fluorophenyl)(1H-indol-3-yl)methyl)malononitrile

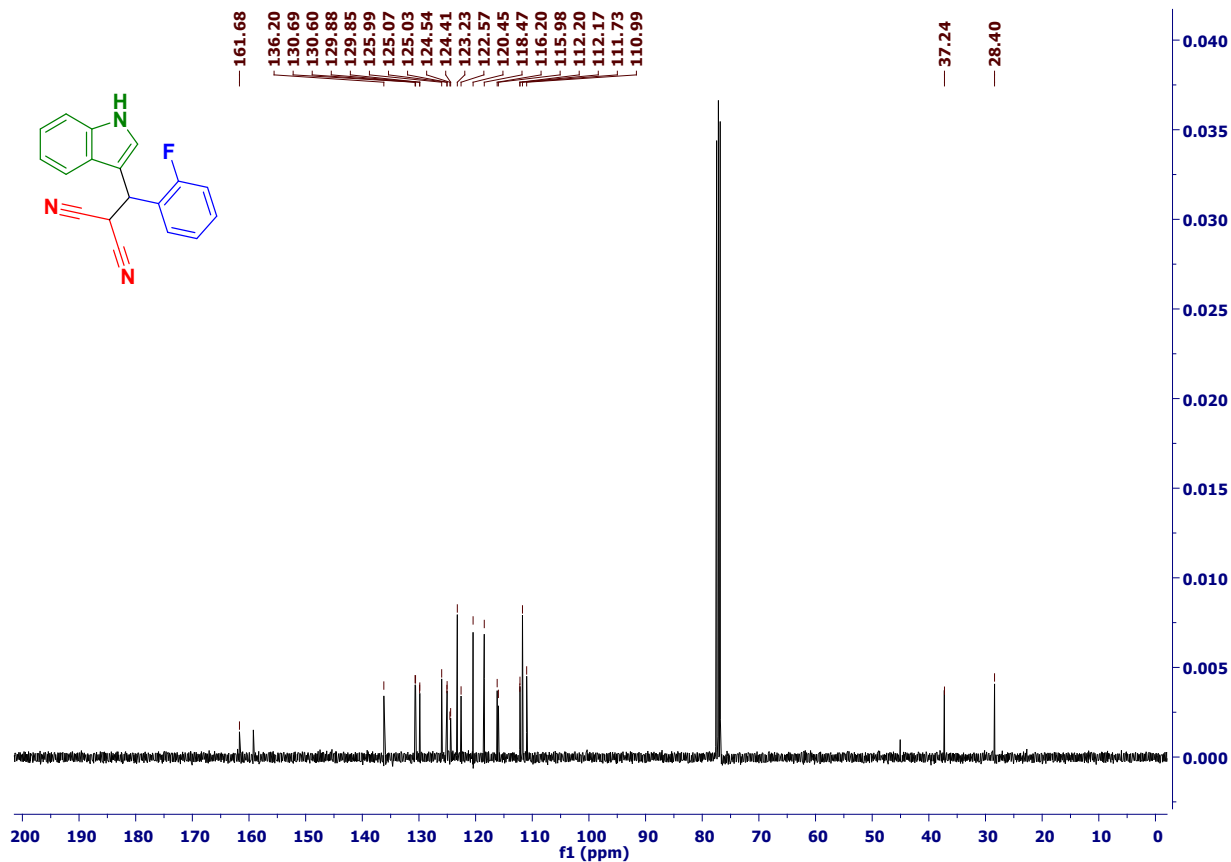

**Fig. 8(b):**  $^{13}\text{C}$ -NMR of 2-((2-fluorophenyl)(1H-indol-3-yl)methyl)malononitrile

**9. 2-((5-bromo-1H-indol-3-yl)(4-nitrophenyl)methyl)-3-hydroxy-5,5-dimethylcyclohex-2-enone**

Yellow Solid;  $^1\text{H}$  NMR (400 MHz,  $\text{DMSO-d}_6$ ):  $\delta$  11.07 (s, 1H), 10.74 (s, 1H), 8.04 (d, 2H,  $J = 8.8$  Hz), 7.30 (t, 4H,  $J = 8$  Hz), 7.11-7.15 (m, 2H), 7.02 (d, 1H,  $J = 2$  Hz), 5.81 (s, 1H), 2.13-2.37 (m, 4H), 0.96 (s, 6H) ppm.  $^{13}\text{C}$  NMR (75 MHz,  $\text{CDCl}_3$ ):  $\delta$  153.61, 145.73, 135.21, 129.53, 126.68, 123.79, 123.31, 121.53, 121.08, 116.90, 116.23, 114.66, 114.25, 114.08, 111.51, 35.50, 32.19, 28.42 ppm. HRMS (ES): Calcd: 469.3278. Found: 470.3338  $[\text{M}+\text{H}]^+$  and 471.3333  $[\text{MH}+2]^+$ .

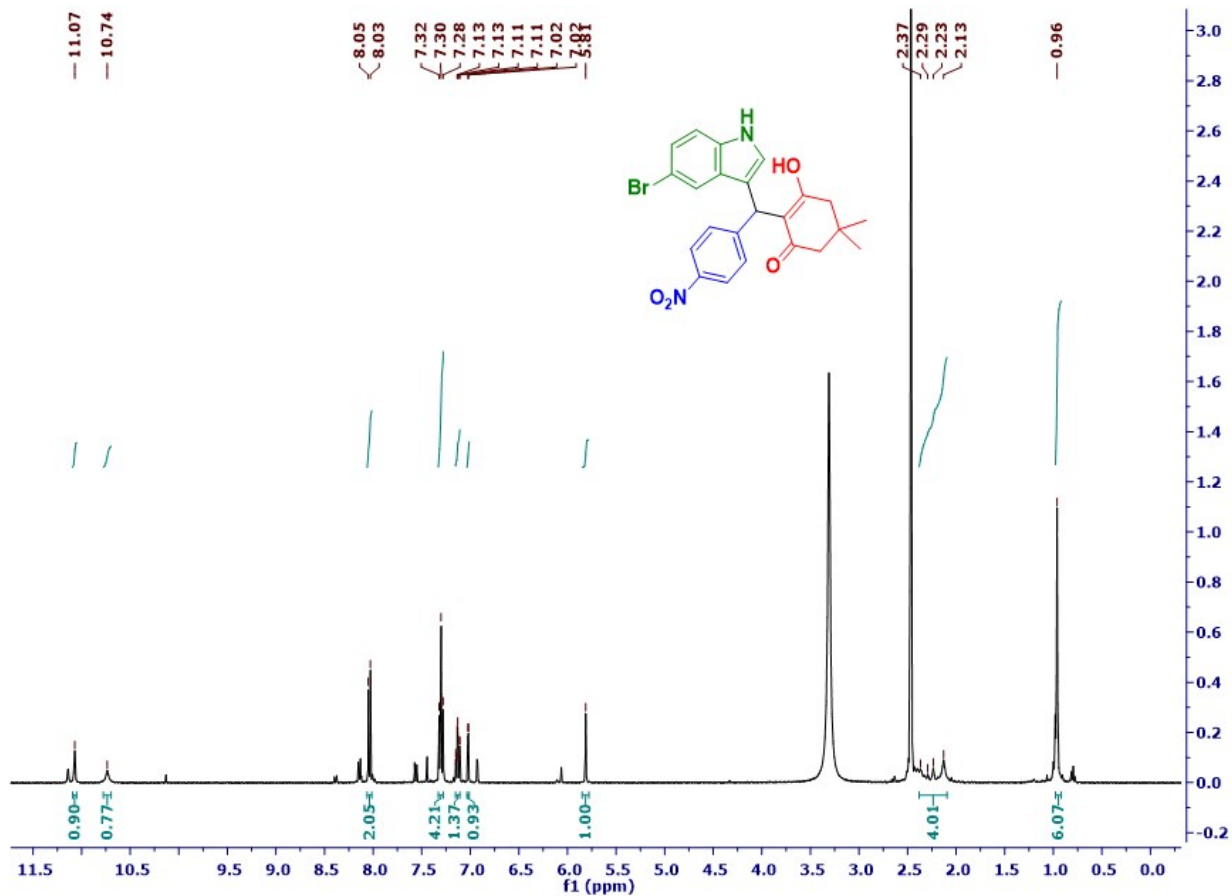

**Fig. 9(a):**  $^1\text{H-NMR}$  of 2-((5-bromo-1H-indol-3-yl)(4-nitrophenyl)methyl)-3-hydroxy-5,5-dimethylcyclohex-2-enone

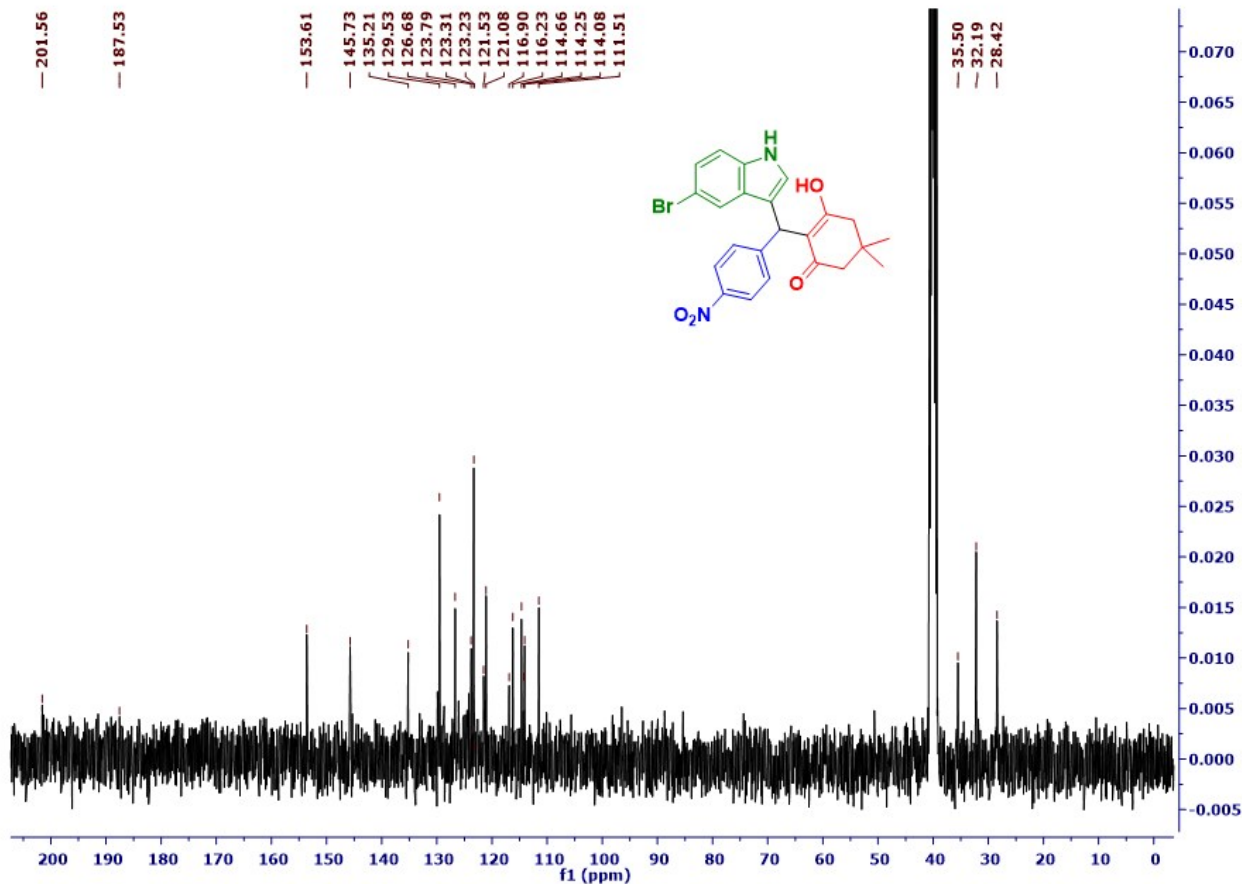

**Fig. 9(b):**  $^{13}\text{C}$ -NMR of 2-((5-bromo-1H-indol-3-yl)(4-nitrophenyl)methyl)-3-hydroxy-5,5-dimethylcyclohex-2-enone

**10. 2-((5-bromo-1H-indol-3-yl)(2-nitrophenyl)methyl)-3-hydroxy-5,5-dimethylcyclohex-2-enone**

Orange Solid;  $^1\text{H}$  NMR (400 MHz,  $\text{DMSO-d}_6$ ):  $\delta$  11.01 (s, 1H), 10.55 (s, 1H), 7.66 (d, 1H,  $J = 8\text{Hz}$ ), 7.40 (t, 1H,  $J = 7.6\text{ Hz}$ ), 7.28-7.34 (m, 3H), 7.20 (d, 1H,  $J = 8\text{ Hz}$ ), 7.12 (dd, 1H,  $J = 8.6\text{ Hz}$ ,  $J_2 = 1.6\text{ Hz}$ ), 6.90 (s, 1H), 6.14 (s, 1H), 2.04-2.31 (m, 4H), 0.92 (s, 6H) ppm.  $^{13}\text{C}$  NMR (75 MHz,  $\text{CDCl}_3$ ):  $\delta$  201.23, 190.50, 155.85, 150.16, 131.93, 131.77, 129.26, 127.22, 126.60, 123.79, 121.05, 114.84, 114.69, 114.12, 111.48, 111.19, 43.57, 31.77, 28.48, 28.28 ppm. HRMS (ES): Calcd: 468.0685. Found: 469.0656  $[\text{M}+\text{H}]^+$  and 470.0740  $[\text{MH}+2]^+$ .

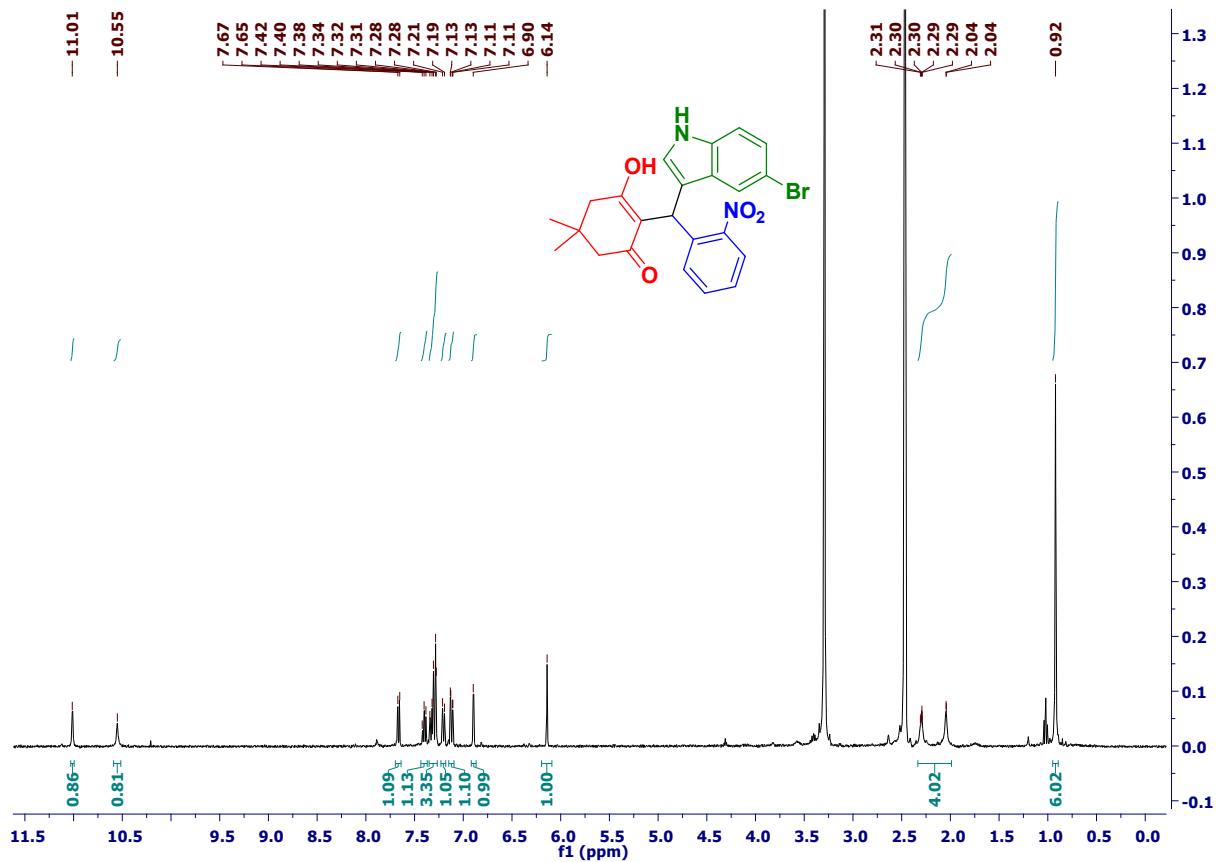

**Fig. 10(a):** <sup>1</sup>H-NMR of 2-((5-bromo-1H-indol-3-yl)(2-nitrophenyl)methyl)-3-hydroxy-5,5-dimethylcyclohex-2-enone

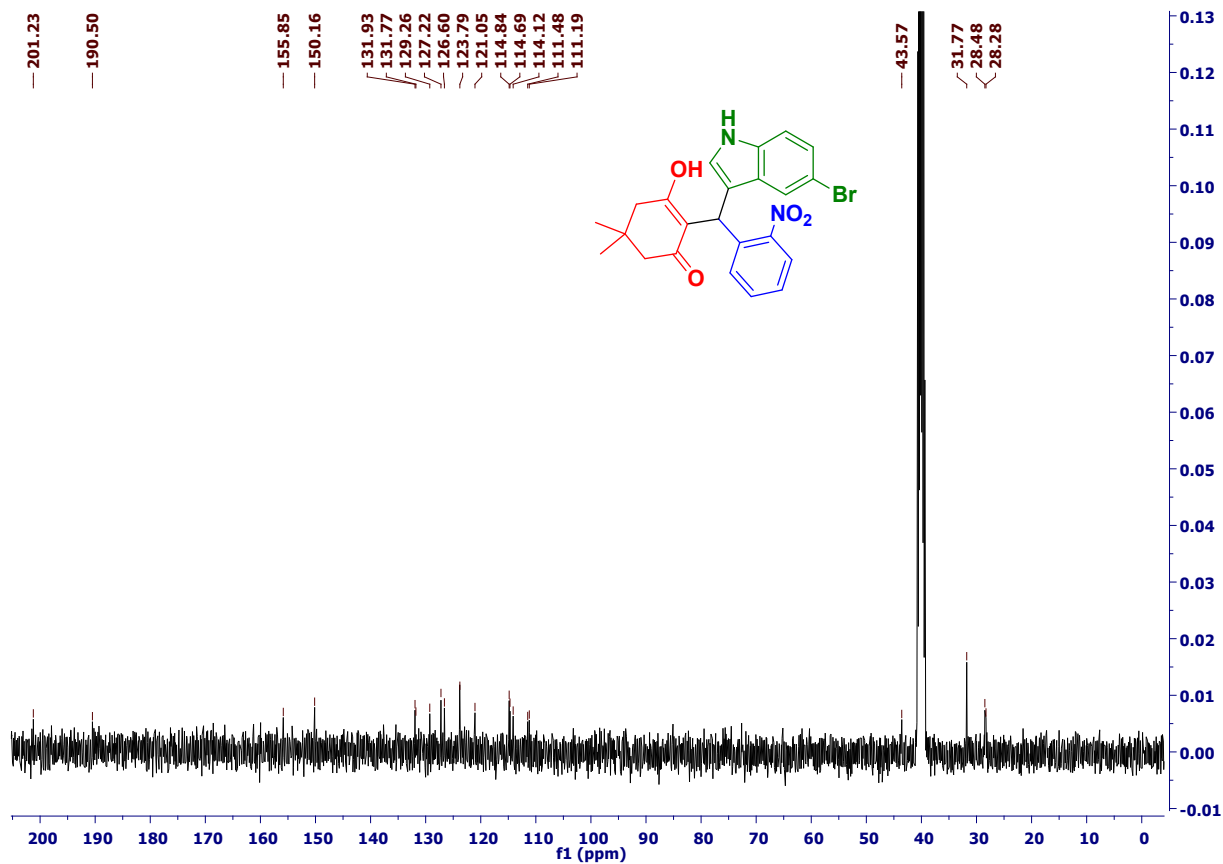

**Fig. 10(b):**  $^{13}\text{C}$ -NMR of 2-((5-bromo-1H-indol-3-yl)(2-nitrophenyl)methyl)-3-hydroxy-5,5-dimethylcyclohex-2-enone

### 11. 2-((1H-indol-3-yl)(pyridin-2-yl)methyl)-3-hydroxy-5,5-dimethylcyclohex-2-enone

White Solid;  $^1\text{H}$  NMR (400 MHz,  $\text{CDCl}_3$ ):  $\delta$  8.45 (d, 1H,  $J = 1\text{ Hz}$ ,  $J = 4\text{ Hz}$ ), 7.96 (brs, 1H), 7.81 (t, 1H,  $J = 7.6\text{ Hz}$ ), 7.59 (d, 1H,  $J = 8\text{ Hz}$ ), 7.53 (d, 1H,  $J = 1.6\text{ Hz}$ ), 7.25-7.30 (m, 2H), 7.13-7.20 (m, 2H), 6.89 (d, 1H,  $J = 2\text{ Hz}$ ), 6.17 (s, 1H), 2.24-2.38 (m, 4H), 1.01 (s, 6H) ppm,  $^{13}\text{C}$  NMR (75 MHz,  $\text{CDCl}_3$ ):  $\delta$  196.63, 185.97, 146.69, 139.35, 139.21, 135.09, 125.04, 124.34, 123.33, 122.55, 122.23, 116.59, 112.46, 67.70, 66.55, 38.15, 31.43 ppm. HRMS (ES): Calcd: 346.1679. Found: 347.1742  $[\text{M}+\text{H}]^+$  and 348.1734  $[\text{M}+\text{H}+2]^+$ .

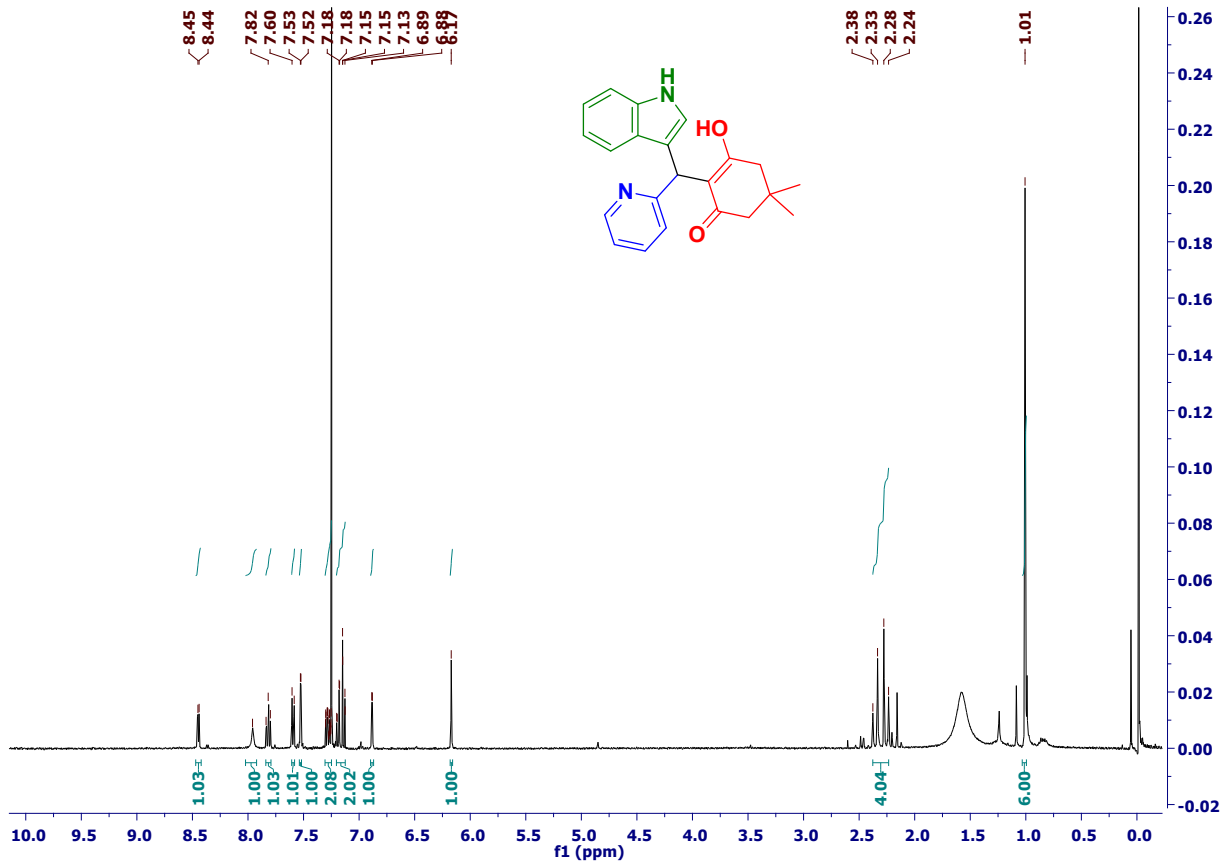

**Fig. 11(a):** <sup>1</sup>H-NMR of 2-((1H-indol-3-yl)(pyridin-2-yl)methyl)-3-hydroxy-5,5-dimethylcyclohex-2-enone

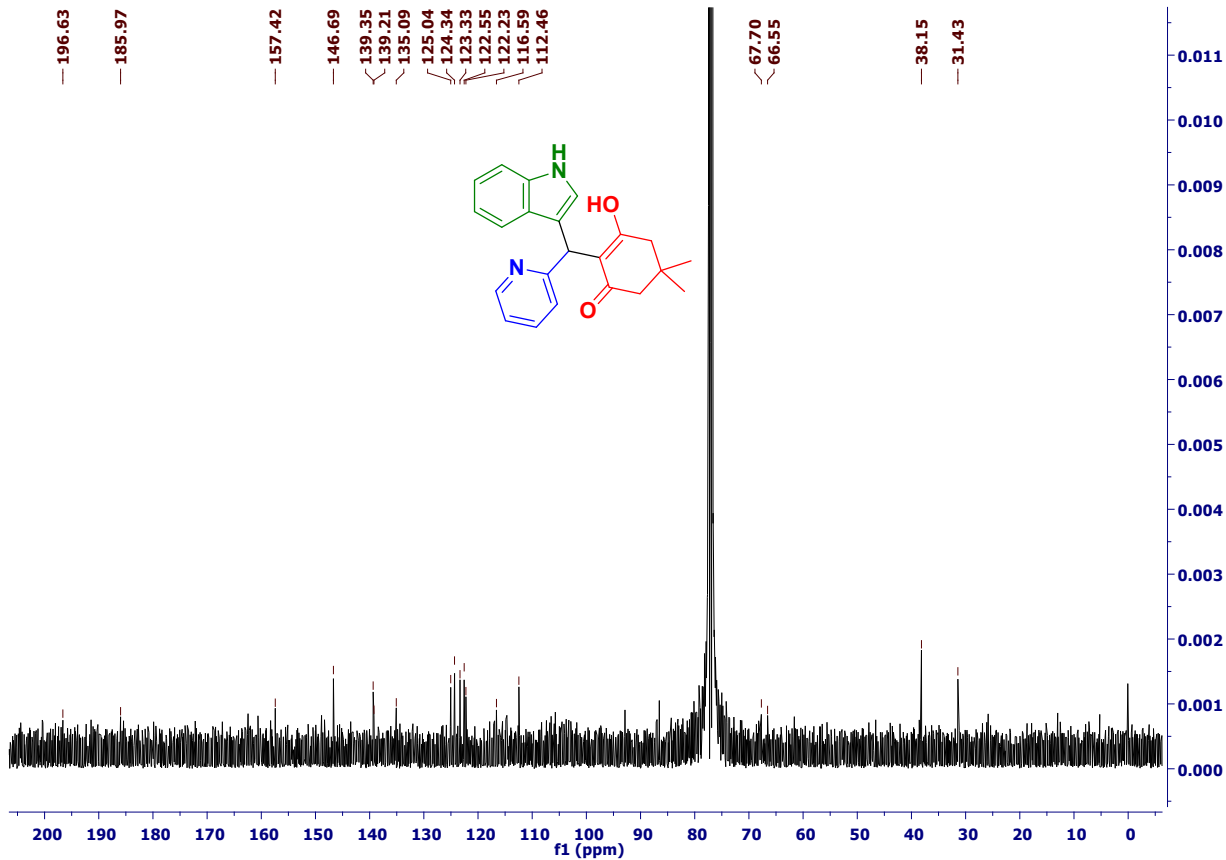

**Fig. 11(b):**  $^{13}\text{C}$ -NMR of 2-((1H-indol-3-yl)(pyridin-2-yl)methyl)-3-hydroxy-5,5-dimethylcyclohex-2-enone

**12. 2-((3-bromophenyl)(1H-indol-3-yl)methyl)-3-hydroxy-5,5-dimethylcyclohex-2-enone**

Red Solid;  $^1\text{H}$  NMR (400 MHz,  $\text{CDCl}_3$ ):  $\delta$  8.39 (s, 1H), 7.46-7.48 (m, 1H), 7.43 (d, 1H,  $J = 4\text{Hz}$ ), 7.32-7.38 (m, 3H), 7.14-7.24 (m, 3H), 7.09 (t, 1H,  $J = 7.6\text{Hz}$ ), 5.85 (s, 1H), 1.22-1.25 (m, 2H), 1.08 (s, 6H), 0.85-1.02 (m, 2H) ppm.  $^{13}\text{C}$  NMR (75 MHz,  $\text{CDCl}_3$ ):  $\delta$  186.43, 184.52, 144.23, 137.21, 131.52, 131.42, 130.30, 129.94, 127.09, 126.45, 123.55, 122.78, 120.34, 119.38, 117.49, 114.71, 111.72, 54.17, 36.78, 32.02, 31.68, 29.80, 28.44 ppm. HRMS (ES): Calcd:423.0834 Found: 424.0834  $[\text{M}+\text{H}]^+$  and 425.0838  $[\text{MH}+2]^+$ .



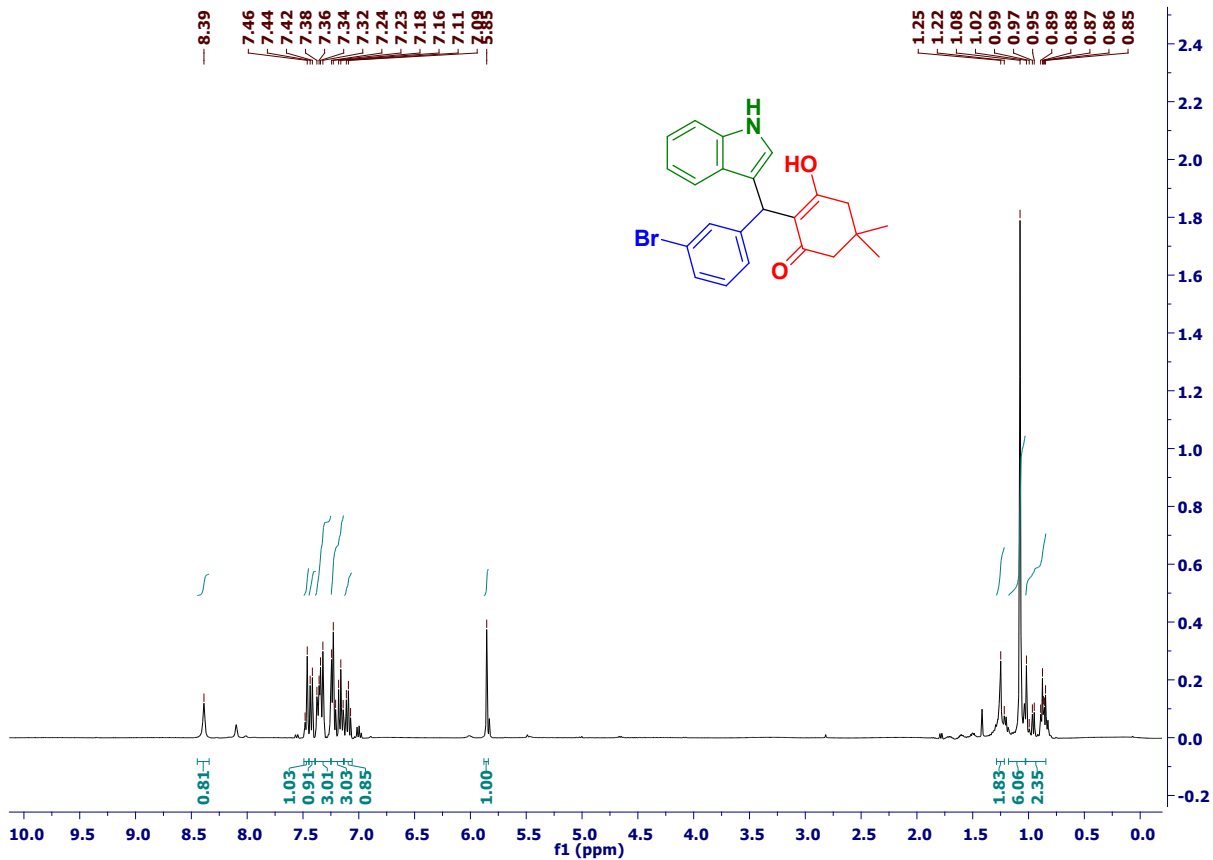

**Fig. 12(a):** <sup>1</sup>H-NMR of 2-((3-bromophenyl)(1H-indol-3-yl)methyl)-3-hydroxy-5,5-dimethylcyclohex-2-enone

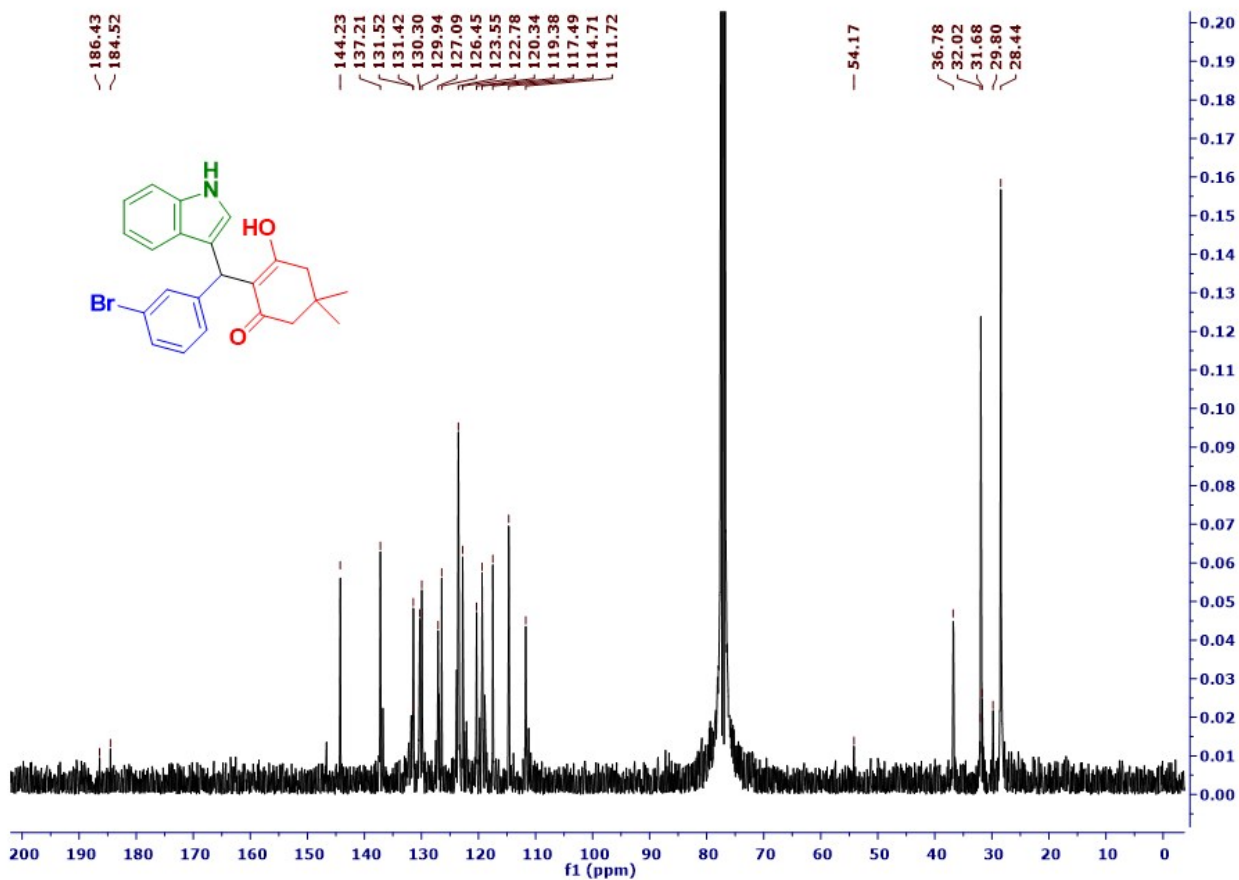

**Fig. 12(b):**  $^{13}\text{C}$ -NMR of 2-((3-bromophenyl)(1H-indol-3-yl)methyl)-3-hydroxy-5,5-dimethylcyclohex-2-enone

**13. 2-((5-bromo-1H-indol-3-yl)(p-tolyl)methyl)-3-hydroxy-5,5-dimethylcyclohex-2-enone**

Reddish Yellow Solid;  $^1\text{H}$  NMR (400 MHz,  $\text{CDCl}_3$ ):  $\delta$  8.30 (brs, 1H), 7.54 (s, 1H), 7.28 (d, 1H,  $J = 8.8$  Hz), 7.12-7.21 (m, 5H), 6.62 (s, 1H), 5.82 (s, 1H), 2.32 (s, 3H), 1.07-1.24 (m, 10H) ppm.  $^{13}\text{C}$  NMR (75 MHz,  $\text{CDCl}_3$ ):  $\delta$  197.30, 171.65, 138.25, 136.58, 135.86, 135.42, 129.68, 128.40, 128.10, 126.14, 124.54, 122.28, 117.73, 115.66, 113.39, 113.00, 112.41, 109.45, 43.09, 39.53, 36.04, 31.93, 28.36, 21.15 ppm. HRMS (ES): Calcd: 437.0983. Found: 438.1062  $[\text{M}+\text{H}]^+$  and 439.1082  $[\text{MH}+2]^+$ .

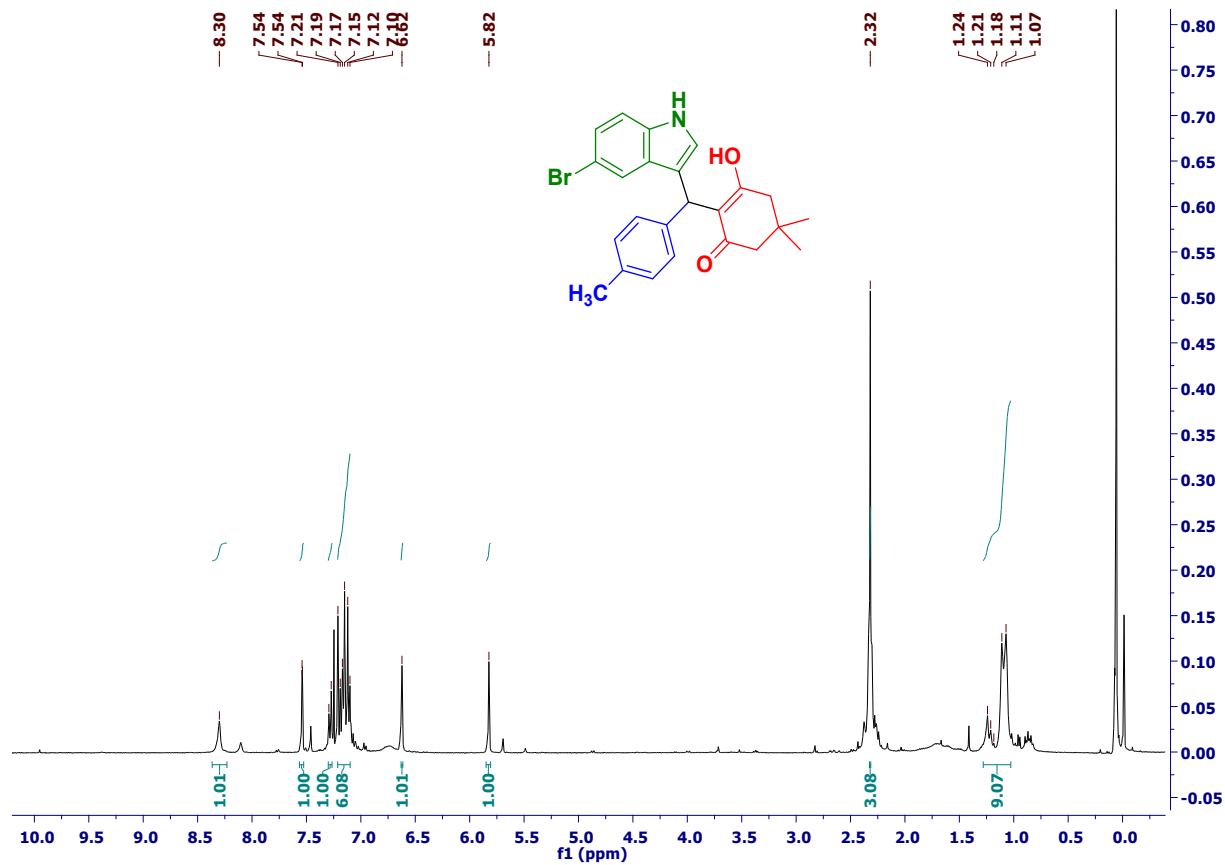

**Fig. 13(a):** <sup>1</sup>H-NMR of 2-((5-bromo-1H-indol-3-yl)(p-tolyl)methyl)-3-hydroxy-5,5-dimethylcyclohex-2-enone

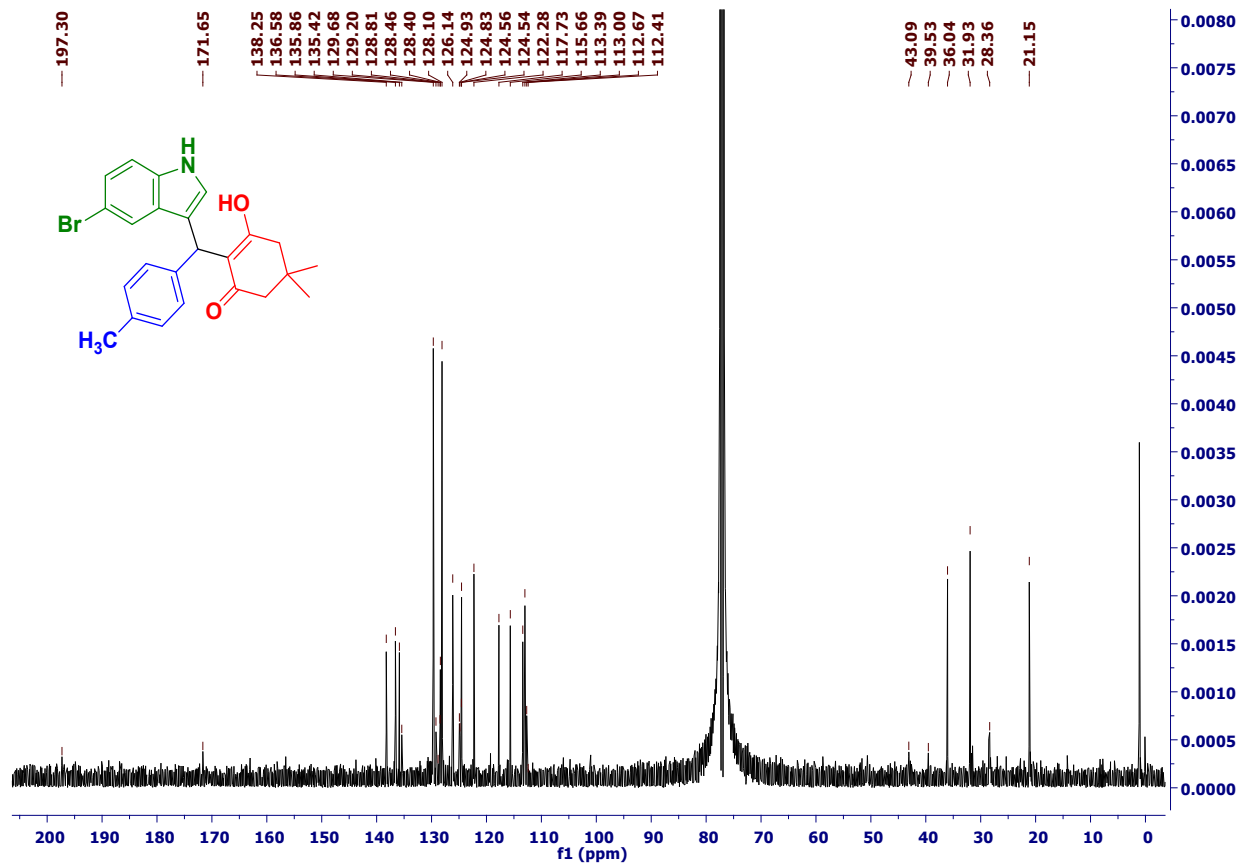

**Fig. 13(b):**  $^{13}\text{C}$ -NMR of 2-((5-bromo-1H-indol-3-yl)(p-tolyl)methyl)-3-hydroxy-5,5-dimethylcyclohex-2-enone

### Calculation of green chemistry matrices

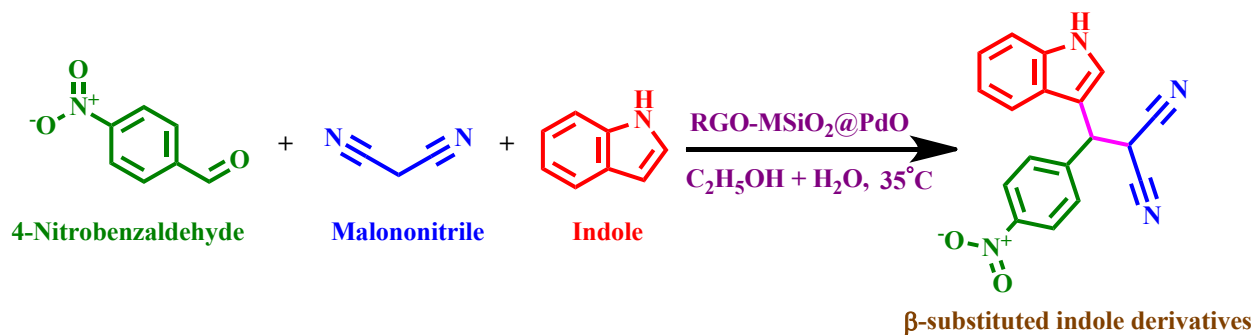

|               |              |             |              |              |
|---------------|--------------|-------------|--------------|--------------|
| <b>M.W.</b>   | 151.12 g/mol | 66.06 g/mol | 117.15 g/mol | 316.31 g/mol |
| <b>mmol</b>   | 1            | 1           | 1            | 0.98         |
| <b>amount</b> | 0.151 g      | 0.066 g     | 0.117 g      | 0.310 g      |

- a) **E-factor:** The calculated E-factor for chemical transformation signifies the total amount of waste generated. It can be calculated as mass of waste divided by total mass of product formed. The ideal E-factor value is zero.

$$\text{E-factor} = \frac{[\text{Mass of waste}]}{[\text{Mass of product}]}$$

Where,

$$\text{Mass of waste} = \text{Total mass of stoichiometric reactant} - \text{Total mass of product formed}$$

$$\begin{aligned} \text{E-factor} &= (0.151 + 0.066 + 0.117 - 0.310)/0.310 \\ &= 0.077 \end{aligned}$$

- b) **Atom Economy (AE):** The calculated atom economy values signify the percentage of atoms wasted in a chemical transformation. The ideal atom economy value is 100% which indicates the complete conversion of reactants into product. Higher the value of atom economy, the greener is the chemical transformation.

$$\begin{aligned} \text{AE} &= \frac{[\text{M.W. of product}]}{\sum (\text{M.W. of stoichiometric reactants})} \times 100 \\ &= [316.31 / (151.12 + 66.06 + 117.15)] \times 100 \\ &= 94.61\% \end{aligned}$$

- c) **Carbon Efficiency (CE):** It signifies the percentage of carbon atoms left in the product in respect to the carbon atoms of the reactants.

$$\begin{aligned}
 \text{CE} &= \frac{[(\text{No. of moles of product})(\text{No. of carbon in product})]}{\sum [(\text{No. of moles of reactant})(\text{No. of carbon in reactant})]} \times 100 \\
 &= \frac{(0.98 \times 18)}{[(1 \times 7) + (1 \times 3) + (1 \times 8)]} \times 100 = 98 \%
 \end{aligned}$$

d) **Process Mass Intensity (PMI):** It is defined as the ratio of total mass used in a process to the mass of product.

$$\begin{aligned}
 \text{PMI} &= \frac{\sum (\text{Mass of stoichiometric reactants})}{\text{Mass of product}} \\
 &= \frac{(0.151 + 0.066 + 0.117)}{0.310} \\
 &= 1.077
 \end{aligned}$$

Alternatively,

$$\text{PMI} = \text{E-factor} + 1 = 0.077 + 1 = 1.077$$

e) **Reaction Mass Efficiency (RME):** It is defined as the percentage ratio of mass of product to the sum of total mass of stoichiometric reactants.

$$\begin{aligned}
 \text{RME} &= \frac{\text{Mass of product}}{\sum (\text{Mass of stoichiometric reactants})} \times 100 \\
 &= \frac{0.310}{(0.151 + 0.066 + 0.117)} \times 100 \\
 &= 92.81 \%
 \end{aligned}$$

**Table D1:** Optimization of effective catalyst, catalyst amount and an appropriate solvent for access

| Entry      | Solvent                                                    | Catalyst (mg, mol%)                        | Temp. (°C) | Time (min.) | Yield <sup>a</sup> (%) |
|------------|------------------------------------------------------------|--------------------------------------------|------------|-------------|------------------------|
| 1.         | Solvent less                                               | RGO-MSiO <sub>2</sub> /PdO (10, 0.17)      | R.T.       | 90          | Traces                 |
| 2.         | Solvent less                                               | RGO-MSiO <sub>2</sub> /PdO (15, 0.25)      | 60         | 90          | 42                     |
| 3.         | C <sub>2</sub> H <sub>5</sub> OH                           | RGO-MSiO <sub>2</sub> /PdO (10, 0.17)      | R.T.       | 60          | 74                     |
| 4.         | C <sub>2</sub> H <sub>5</sub> OH                           | RGO-MSiO <sub>2</sub> /PdO (7, 0.12)       | 50         | 30          | 82                     |
| 5.         | C <sub>2</sub> H <sub>5</sub> OH                           | RGO-MSiO <sub>2</sub> /PdO (10, 0.17)      | 50         | 30          | 92                     |
| 6.         | C <sub>2</sub> H <sub>5</sub> OH                           | RGO-MSiO <sub>2</sub> /PdO (10, 0.17)      | 80         | 60          | 76                     |
| 7.         | CH <sub>2</sub> Cl <sub>2</sub>                            | RGO-MSiO <sub>2</sub> /PdO (10, 0.17)      | 40         | 90          | 63                     |
| 8.         | DMSO                                                       | RGO-MSiO <sub>2</sub> /PdO (10, 0.17)      | 80         | 90          | 59                     |
| 9.         | Toluene                                                    | RGO-MSiO <sub>2</sub> /PdO (10, 0.17)      | 50         | 90          | 46                     |
| 10.        | THF                                                        | RGO-MSiO <sub>2</sub> /PdO (10, 0.17)      | 40         | 90          | 52                     |
| 11.        | CHCl <sub>3</sub>                                          | RGO-MSiO <sub>2</sub> /PdO (10, 0.17)      | 40         | 90          | 64                     |
| 12.        | H <sub>2</sub> O                                           | RGO-MSiO <sub>2</sub> /PdO (10, 0.17)      | R.T.       | 60          | 53                     |
| 13.        | H <sub>2</sub> O                                           | RGO-MSiO <sub>2</sub> /PdO (10, 0.17)      | 50         | 60          | 71                     |
| 14.        | H <sub>2</sub> O + C <sub>2</sub> H <sub>5</sub> OH (1:1)  | RGO-MSiO <sub>2</sub> /PdO (10, 0.17)      | 50         | 15          | 98                     |
| <b>15.</b> | <b>H<sub>2</sub>O + C<sub>2</sub>H<sub>5</sub>OH (1:1)</b> | <b>RGO-MSiO<sub>2</sub>/PdO (10, 0.17)</b> | <b>35</b>  | <b>15</b>   | <b>98</b>              |
| 16.        | H <sub>2</sub> O + C <sub>2</sub> H <sub>5</sub> OH (1:1)  | GO (25)                                    | 50         | 90          | 15                     |
| 17.        | H <sub>2</sub> O + C <sub>2</sub> H <sub>5</sub> OH (1:1)  | RGO-MSiO <sub>2</sub> (20)                 | 50         | 90          | 23                     |
| 18.        | H <sub>2</sub> O + C <sub>2</sub> H <sub>5</sub> OH (1:1)  | -                                          | 50         | 120         | -                      |

**Reaction conditions:** Active methylene compound (1 mmol), 4-Nitrobenzaldehyde (1mmol), Indole (1mmol), <sup>a</sup>Isolated yield.

2-substituted indole derivatives by using RGO-MSiO<sub>2</sub>/PdO HY-NM as catalyst.

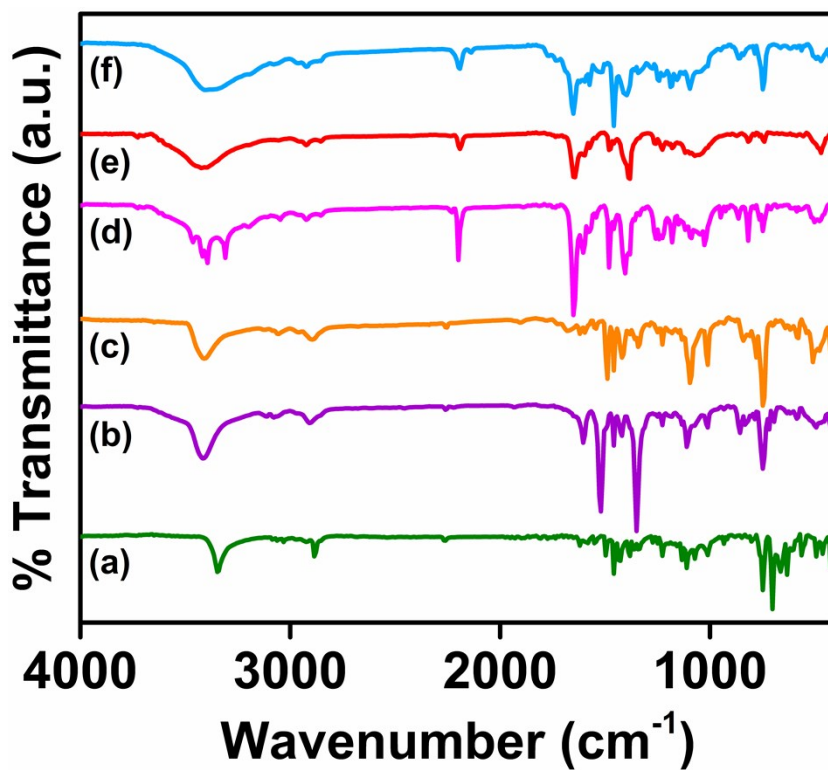

**Fig. 14:** FTIR spectrum of **(a)** 2-((1H-indol-3-yl)(phenyl)methyl)malononitrile, **(b)** 2-((1H-indol-3-yl)(4-nitrophenyl)methyl)malononitrile, **(c)** 2-((4-chlorophenyl)(1H-indol-3-yl)methyl)malononitrile, **(d)** 2-((5-chloro-2-hydroxyphenyl)(1H-indol-3-yl)methyl)malononitrile, **(e)** 2-((5-bromo-2-hydroxyphenyl)(1H-indol-3-yl)methyl)malononitrile, **(f)** 2-((3,5-dichloro-2-hydroxyphenyl)(1H-indol-3-yl)methyl)malononitrile.



**Table D2:** Comparative study of RGO-MSiO<sub>2</sub>/PdO with previously published diverse reports based on GO/SiO<sub>2</sub> catalysts.

| S.N. | Final Catalyst (Support)                            | Morphology        | Surface Area (m <sup>2</sup> /g) | Pore Size (nm) | Pore Volume (cm <sup>3</sup> /g) | Application                                         | Ref.      |
|------|-----------------------------------------------------|-------------------|----------------------------------|----------------|----------------------------------|-----------------------------------------------------|-----------|
| 1.   | GO/SiO <sub>2</sub>                                 | Mesoporous Sphere | -                                | 10.24          | -                                | -                                                   | 1         |
| 2.   | Cu(II)-IIP-2 (MS/MGO)                               | Mesoporous Sheet  | 194.1 (279.6)                    | -              | -                                | Synthesis of 1-methyl-4-(p-tolyloxy)benzene         | 2         |
| 3.   | Cu@βCD-PEG-mesoGO (βCD-PEG-mesoGO)                  | Mesoporous Sheet  | 592.34 (798.23)                  | 5.97 (6.8)     | -                                | Synthesis of 1,2,3-triazole and 2-arylbenzimidazole | 3         |
| 4.   | GOSCh                                               | Sheet             | 10.16                            | 70.8           | 1.078                            | Water Treatment                                     | 4         |
| 5.   | GCS                                                 | Sheet             | 328                              | -              | -                                | Water Treatment                                     | 5         |
| 6.   | GSF@AuNPs (RGO-PMS)                                 | Mesoporous Sheet  | 470.87 (879.67)                  | -              | -                                | Cancer Cell Detection                               | 6         |
| 7.   | RGO-PMS@AuNPs                                       | Mesoporous Sheet  | 542.34 (862.37)                  | 3.1            | -                                | Cancer Cell Detection                               | 7         |
| 8.   | rGO@mSiO <sub>2</sub> -1                            | Mesoporous Sheet  | 755                              | 8.9            | 1.92                             | -                                                   | 8         |
| 9.   | RGO-MSiO <sub>2</sub> /PdO (RGO-MSiO <sub>2</sub> ) | Mesoporous Sheet  | 574.2 (583.3)                    | 12.49 (17.26)  | 1.685 (1.978)                    | Synthesis of β-substituted indole derivatives       | This Work |

**Table D3:** Comparative study of RGO-MSiO<sub>2</sub>/PdO with previously published diverse reports based on other GO nanocomposites for the synthesis of β-substituted indole derivatives.

| S.N. | Reactants                                                                           | Catalyst (Amount)               | Reaction Conditions | Yield (%) | Ref. |
|------|-------------------------------------------------------------------------------------|---------------------------------|---------------------|-----------|------|
| 1.   | 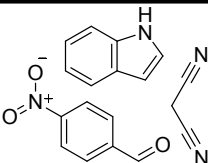 | RGO/ZnO, (5 Wt %)               | 50 °C, 30 min       | 95        | 9    |
| 2.   |  | GO-IL-NH <sub>2</sub> , (10 mg) | 50 °C, 30 min       | 98        | 10   |

|    |                                                                                   |                                        |               |    |           |
|----|-----------------------------------------------------------------------------------|----------------------------------------|---------------|----|-----------|
| 3. | 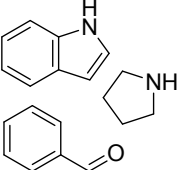 | MGO-IL-NH <sub>2</sub> ,<br>(20 mg)    | 50 °C, 60 min | 92 | 11        |
| 4. |  | GO (20 wt %)                           | R.T., 5.5 h   | 80 | 12        |
| 5. |  | Nano Au-Pd-rGO,<br>(0.5 mol %)         | R.T., 5 h     | 91 | 13        |
| 6. |  | RGO-MSiO <sub>2</sub> /PdO,<br>(10 mg) | 35 °C, 15 min | 98 | This Work |

## References

- 1 C. M. Yoon, S. Lee, S. H. Hong and J. Jang, *J. Colloid Interface Sci.*, 2015, **438**, 14–21.
- 2 P. Fang, W. Xia, Y. Zhou, Z. Ai, W. Yin, M. Xia, J. Yu, R. A. Chi and Q. Yue, *Chem. Eng. J.*, 2020, **385**, 123847.
- 3 S. Bahadorikhalili, L. Ma'mani, H. Mahdavi and A. Shafiee, *Microporous Mesoporous Mater.*, 2018, **262**, 207–216.
- 4 S. Azizkhani, E. Mahmoudi, N. Abdullah, M. H. S. Ismail, A. W. Mohammad and S. A. Hussain, *Polymers (Basel)*, 2020, **12**, 1922.
- 5 X. Liu, H. Zhang, Y. Ma, X. Wu, L. Meng, Y. Guo, G. Yu and Y. Liu, *J. Mater. Chem. A*, 2013, **1**, 1875–1884.
- 6 S. K. Maji, A. K. Mandal, K. T. Nguyen, P. Borah and Y. Zhao, *ACS Appl. Mater. Interfaces*, 2015, **7**, 9807–9817.
- 7 S. K. Maji, S. Sreejith, A. K. Mandal, X. Ma and Y. Zhao, *ACS Appl. Mater. Interfaces*, 2014, **6**, 13648–13656.
- 8 Y. Liu, W. Li, D. Shen, C. Wang, X. Li, M. Pal, R. Zhang, L. Chen, C. Yao, Y. Wei, Y. Li, Y. Zhao, H. Zhu, W. Wang, A. M. El-Toni, F. Zhang and D. Zhao, *Chem. Mater.*, 2015, **27**, 5577–5586.
- 9 U. C. Rajesh, J. Wang, S. Prescott, T. Tsuzuki and D. S. Rawat, *ACS Sustain. Chem. Eng.*, 2015, **3**, 9–18.
- 10 C. Garkoti, J. Shabir, P. Gupta, M. Sharma and S. Mozumdar, *New J. Chem.*, 2017, **41**, 15545–15554.

- 11 C. Garkoti, J. Shabir and S. Mozumdar, *ChemistrySelect*, 2020, **5**, 4337–4346.
- 12 A. Vijay Kumar and K. Rama Rao, *Tetrahedron Lett.*, 2011, **52**, 5188–5191.
- 13 S. B. Gohain, M. Basumatary, P. K. Boruah, M. R. Das and A. J. Thakur, *Green Chem.*, 2020, **22**, 170–179.
